# Supplementary material for: Rehabilitation and release of confiscated songbirds into the wild: A pilot study
Source: Front Vet Sci. 2023 Mar 30;10:1109568. doi: 10.3389/fvets.2023.1109568 (PMC10098152; doi:10.3389/fvets.2023.1109568)
Supplement: Supplementary Table 2 — Dataset rehabilitation and release. [file Table_2.xlsx]

## Sheet: rehabilitated&relesed
SPECIES	SEX	RING	DATA ENTRY	RELEASE	SITE	COORDINATES
BRAZILIAN TANAGER	M	SILVER.CETAS 2015 3.2 30751	2018-10-18	2018-12-11	PARATI/RJ	23°17'39"S 44°42'14"O
BRAZILIAN TANAGER	M	SILVER.CETAS 2015 3.2 30752	2018-10-18	2018-12-11	PARATI/RJ	23°17'39"S 44°42'14"O
BRAZILIAN TANAGER	M	SILVER.CETAS 2015 3.2 30753	2018-10-18	2018-12-11	PARATI/RJ	23°17'39"S 44°42'14"O
BRAZILIAN TANAGER	M	SILVER.CETAS 2015 3.2 30754	2018-10-18	2018-12-11	PARATI/RJ	23°17'39"S 44°42'14"O
BRAZILIAN TANAGER	M	SILVER.CETAS 2015 3.2 30755	2018-10-18	2018-12-11	PARATI/RJ	23°17'39"S 44°42'14"O
BRAZILIAN TANAGER	M	SILVER.CETAS 2015 3.2 30756	2018-10-18	2018-12-11	PARATI/RJ	23°17'39"S 44°42'14"O
BRAZILIAN TANAGER	M	SILVER.CETAS 2015 3.2 30757	2018-10-18	2018-12-11	PARATI/RJ	23°17'39"S 44°42'14"O
BRAZILIAN TANAGER	M	SILVER.CETAS 2015 3.2 30759	2018-10-18	2018-12-11	PARATI/RJ	23°17'39"S 44°42'14"O
BRAZILIAN TANAGER	M	SILVER.CETAS 2015 3.2 30760	2018-10-18	2018-12-11	PARATI/RJ	23°17'39"S 44°42'14"O
BRAZILIAN TANAGER	M	SILVER.CETAS 2015 3.2 30761	2018-10-18	2018-12-11	PARATI/RJ	23°17'39"S 44°42'14"O
BRAZILIAN TANAGER	M	SILVER.CETAS 2015 3.2 30762	2018-10-18	2018-12-11	PARATI/RJ	23°17'39"S 44°42'14"O
BRAZILIAN TANAGER	M	SILVER.CETAS 2015 3.2 30774	2018-10-18	2018-12-11	PARATI/RJ	23°17'39"S 44°42'14"O
BRAZILIAN TANAGER	NI	SILVER.CETAS 2015 3.2 30775	2018-10-18	2018-12-11	PARATI/RJ	23°17'39"S 44°42'14"O
BRAZILIAN TANAGER	M	RED.CEMAS-UFRGS 3.5 407	2018-10-18	2018-12-11	PARATI/RJ	23°17'39"S 44°42'14"O
CINNAMON TANAGER	NI	SILVER.CETAS 2015 3.2 30758	2018-10-18	2018-12-11	PARATI/RJ	23°17'39"S 44°42'14"O
CINNAMON TANAGER	NI	SILVER.CETAS 2015 3.2 30763	2018-10-18	2018-12-11	PARATI/RJ	23°17'39"S 44°42'14"O
CINNAMON TANAGER	NI	SILVER.CETAS 2015 3.2 30764	2018-10-18	2018-12-11	PARATI/RJ	23°17'39"S 44°42'14"O
CINNAMON TANAGER	NI	SILVER.CETAS 2015 3.2 30777	2018-10-18	2018-12-11	PARATI/RJ	23°17'39"S 44°42'14"O
CINNAMON TANAGER	NI	SILVER.CETAS 2015 3.2 30765	2018-10-18	2018-12-11	PARATI/RJ	23°17'39"S 44°42'14"O
CINNAMON TANAGER	NI	SILVER.CETAS 2015 3.2 30766	2018-10-18	2018-12-11	PARATI/RJ	23°17'39"S 44°42'14"O
CINNAMON TANAGER	NI	SILVER.CETAS 2015 3.2 30767	2018-10-18	2018-12-11	PARATI/RJ	23°17'39"S 44°42'14"O
CINNAMON TANAGER	NI	SILVER.CETAS 2015 3.2 30768	2018-10-18	2018-12-11	PARATI/RJ	23°17'39"S 44°42'14"O
CINNAMON TANAGER	NI	SILVER.CETAS 2015 3.2 30769	2018-10-18	2018-12-11	PARATI/RJ	23°17'39"S 44°42'14"O
CINNAMON TANAGER	NI	SILVER.CETAS 2015 3.2 30770	2018-10-18	2018-12-11	PARATI/RJ	23°17'39"S 44°42'14"O
CINNAMON TANAGER	NI	SILVER.CETAS 2015 3.2 30772	2018-10-18	2018-12-11	PARATI/RJ	23°17'39"S 44°42'14"O
CINNAMON TANAGER	NI	SILVER.CETAS 2015 3.2 30773	2018-10-18	2018-12-11	PARATI/RJ	23°17'39"S 44°42'14"O
YELLOW-LEGGED THRUSH	M	SILVER.CETAS 2015 4.0 00986	2018-10-18	2018-12-12	PARATI/RJ	23°17'39"S 44°42'14"O
YELLOW-LEGGED THRUSH	M	SILVER.CETAS 2015 4.0 00987	2018-10-18	2018-12-13	PARATI/RJ	23°17'39"S 44°42'14"O
GRAY-THROATED WARBLING-FINCH	M	GOLDEN.CEMAS-UFRGS 2.6 249	2018-10-18	2019-02-17	FARM3WETL	30°22'47"S 51°15'28"W
DOUBLE-COLLARED SEEDEATER	M	GOLDEN.CEMAS-UFRGS 2.2 200	2018-10-18	2019-02-17	FARM3WETL	30°22'47"S 51°15'28"W
DOUBLE-COLLARED SEEDEATER	M	GOLDEN.CEMAS-UFRGS 2.2 201	2018-10-18	2019-02-17	FARM3WETL	30°22'47"S 51°15'28"W
DOUBLE-COLLARED SEEDEATER	M	GOLDEN.CEMAS-UFRGS 2.2 202	2018-10-18	2019-02-17	FARM3WETL	30°22'47"S 51°15'28"W
DOUBLE-COLLARED SEEDEATER	M	GOLDEN.CEMAS-UFRGS 2.2 203	2018-10-18	2019-02-17	FARM3WETL	30°22'47"S 51°15'28"W
DOUBLE-COLLARED SEEDEATER	M	GOLDEN.CEMAS-UFRGS 2.2 208	2018-10-18	2019-02-17	FARM3WETL	30°22'47"S 51°15'28"W
DOUBLE-COLLARED SEEDEATER	NI	GOLDEN.CEMAS-UFRGS 2.2 209	2018-10-18	2019-02-17	FARM3WETL	30°22'47"S 51°15'28"W
DOUBLE-COLLARED SEEDEATER	M	GOLDEN.CEMAS-UFRGS 2.2 211	2018-10-18	2019-02-17	FARM3WETL	30°22'47"S 51°15'28"W
DOUBLE-COLLARED SEEDEATER	NI	GOLDEN.CEMAS-UFRGS 2.2 223	2018-10-18	2019-02-17	FARM3WETL	30°22'47"S 51°15'28"W
DOUBLE-COLLARED SEEDEATER	M	GOLDEN.CEMAS-UFRGS 2.2 225	2018-10-18	2019-02-17	FARM3WETL	30°22'47"S 51°15'28"W
DOUBLE-COLLARED SEEDEATER	M	GOLDEN.CEMAS-UFRGS 2.2 227	2018-10-18	2019-02-17	FARM3WETL	30°22'47"S 51°15'28"W
DOUBLE-COLLARED SEEDEATER	NI	SILVER.CETAS.IBAMA 0516	2018-10-18	2019-02-17	FARM3WETL	30°22'47"S 51°15'28"W
DOUBLE-COLLARED SEEDEATER	M	GOLDEN.CEMAS-UFRGS 2.2 231	2018-10-18	2019-02-17	FARM3WETL	30°22'47"S 51°15'28"W
DOUBLE-COLLARED SEEDEATER	NI	SILVER.CETAS.IBAMA 0515	2018-10-18	2019-02-17	FARM3WETL	30°22'47"S 51°15'28"W
DOUBLE-COLLARED SEEDEATER	M	GOLDEN.CEMAS-UFRGS 2.2 236	2018-10-18	2019-02-17	FARM3WETL	30°22'47"S 51°15'28"W
DOUBLE-COLLARED SEEDEATER	M	GOLDEN.CEMAS-UFRGS 2.2 241	2018-10-18	2019-02-17	FARM3WETL	30°22'47"S 51°15'28"W
DOUBLE-COLLARED SEEDEATER	NI	RED.CETAS 2018 2.2 04376	2018-10-18	2019-02-17	FARM3WETL	30°22'47"S 51°15'28"W
BLACK-THROATED GROSBEAK	M	RED.CEMAS-UFRGS 3.5 403	2018-10-18	2019-02-27	CUNHA/SP	23°05'42"S 44°57'41"O
BLACK-THROATED GROSBEAK	M	RED.CEMAS-UFRGS 3.5 404	2018-10-18	2019-02-27	CUNHA/SP	23°05'42"S 44°57'41"O
BLACK-THROATED GROSBEAK	M	RED.CEMAS-UFRGS 4.0 506	2018-10-18	2019-02-27	CUNHA/SP	23°05'42"S 44°57'41"O
BLACK-THROATED GROSBEAK	NI	RED.CEMAS-UFRGS 4.0 508	2018-10-18	2019-02-27	CUNHA/SP	23°05'42"S 44°57'41"O
BUFFY-FRONTED SEEDEATER	NI	GOLDEN.CEMAS-UFRGS 3.0 351	2018-10-18	2019-02-27	CUNHA/SP	23°05'42"S 44°57'41"O
GOLDEN-BILLED SALTATOR	NI	SILVER.IBAMA OA 128778	2018-10-18	2019-03-01	ENCRUZILHADA/RS	30°39'41"S 52°86'13"O
GOLDEN-BILLED SALTATOR	NI	RED.CEMAS-UFRGS 3.5 408	2018-10-18	2019-03-01	ENCRUZILHADA/RS	30°39'41"S 52°86'13"O
GOLDEN-BILLED SALTATOR	M	SILVER.CETAS.IBAMA 3.5 006	2018-10-18	2019-03-01	ENCRUZILHADA/RS	30°39'41"S 52°86'13"O
GOLDEN-BILLED SALTATOR	M	SILVER.IBAMA OA 3.5 07885	2018-10-18	2019-03-01	ENCRUZILHADA/RS	30°39'41"S 52°86'13"O
GOLDEN-BILLED SALTATOR	M	RED.CEMAS-UFRGS 3.5 406	2018-10-18	2019-03-01	ENCRUZILHADA/RS	30°39'41"S 52°86'13"O
GOLDEN-BILLED SALTATOR	NI	SILVER.IBAMA 04-05 3.5 007850	2018-10-18	2019-03-01	ENCRUZILHADA/RS	30°39'41"S 52°86'13"O
GOLDEN-BILLED SALTATOR	NI	RED.CEMAS-UFRGS 3.5 425	2018-10-18	2019-03-01	ENCRUZILHADA/RS	30°39'41"S 52°86'13"O
GOLDEN-BILLED SALTATOR	NI	SILVER.CETAS.IBAMA 3.2 20574	2018-10-18	2019-03-01	ENCRUZILHADA/RS	30°39'41"S 52°86'13"O
DIADEMED TANAGER	NI	GOLDEN.CEMAS-UFRGS 3.0 368	2019-02-12	2019-06-02	FARM4	30°10'21"S 51°00'14"W
DIADEMED TANAGER	M	SILVER.CETAS.IBAMA 2.8 1081	2019-02-12	2019-06-02	FARM4	30°10'21"S 51°00'14"W
DIADEMED TANAGER	M	SILVER.SISPASS 013342	2019-02-12	2019-06-02	FARM4	30°10'21"S 51°00'14"W
RUFOUS-COLLARED SPARROW	M	GOLDEN.CEMAS-UFRGS 3.0 360	2019-02-12	2019-06-02	FARM4	30°10'21"S 51°00'14"W
RUFOUS-COLLARED SPARROW	NI	SILVER.CETAS.IBAMA 2.8 278956	2019-02-12	2019-06-02	FARM4	30°10'21"S 51°00'14"W
RUFOUS-COLLARED SPARROW	M	GOLDEN.CEMAS-UFRGS 3.0 360	2019-02-12	2019-06-07	FARM3WETL	30°22'46"S 51°15'28"W
DOUBLE-COLLARED SEEDEATER	M	GOLDEN.CEMAS-UFRGS 2.2 220	2019-02-12	2019-06-07	FARM3WETL	30°22'46"S 51°15'28"W
DOUBLE-COLLARED SEEDEATER	NI	GOLDEN.CEMAS-UFRGS 2.2 232	2019-02-12	2019-06-07	FARM3WETL	30°22'46"S 51°15'28"W
DOUBLE-COLLARED SEEDEATER	NI	RED.CETAS 2018 2.2 04375	2019-02-12	2019-06-07	FARM3WETL	30°22'46"S 51°15'28"W
BLUE-YELLOW TANAGER	M	RED.CEMAS-UFRGS 3.5 441	2019-02-12	2019-06-07	FARM3WETL	30°22'46"S 51°15'28"W
BLUE-YELLOW TANAGER	M	RED.CEMAS-UFRGS 3.5 430	2019-02-12	2019-06-07	FARM3WETL	30°22'46"S 51°15'28"W
DIADEMED TANAGER	M	BLUE.FOG 2237	2019-02-12	2019-06-07	FARM3WETL	30°22'46"S 51°15'28"W
DIADEMED TANAGER	M	SILVER.SISPASS 2.8 014591	2019-02-12	2019-06-07	FARM3WETL	30°22'46"S 51°15'28"W
DIADEMED TANAGER	M	RED.CEMAS-UFRGS 3.5 438	2019-02-12	2019-06-07	FARM3WETL	30°22'46"S 51°15'28"W
DIADEMED TANAGER	M	BLUE.SOR 3.0 2080	2019-02-12	2019-06-07	FARM3WETL	30°22'46"S 51°15'28"W
DIADEMED TANAGER	NI	RED.CEMAS-UFRGS 3.5 440	2019-02-12	2019-06-07	FARM3WETL	30°22'46"S 51°15'28"W
DOUBLE-COLLARED SEEDEATER	M	SILVER.CETAS.IBAMA 248312	2019-02-12	2019-06-12	FARM2HOU	30°20'50"S 51°14'35"W
RUFOUS-COLLARED SPARROW	M	SILVER.SISPASS 2.8 015204	2019-02-12	2019-06-12	FARM2HOU	30°20'50"S 51°14'35"W
RUFOUS-COLLARED SPARROW	M	SILVER.CETAS.IBAMA 2.8 0840	2019-02-12	2019-06-12	FARM2HOU	30°20'50"S 51°14'35"W
RUFOUS-COLLARED SPARROW	M	GOLDEN.CEMAS-UFRGS 2.6 279	2019-02-12	2019-06-12	FARM2HOU	30°20'50"S 51°14'35"W
RUFOUS-COLLARED SPARROW	NI	SILVER.CETAS.IBAMA 2.8 0842	2019-02-12	2019-06-12	FARM2HOU	30°20'50"S 51°14'35"W
RUFOUS-COLLARED SPARROW	M	GOLDEN.CEMAS-UFRGS 3.0 359	2019-02-12	2019-06-12	FARM2HOU	30°20'50"S 51°14'35"W
RUFOUS-COLLARED SPARROW	M	RED.CEMAS-UFRGS 2.5 122	2019-02-12	2019-06-12	FARM2HOU	30°20'50"S 51°14'35"W
RUFOUS-COLLARED SPARROW	M	GOLDEN.CEMAS-UFRGS 3.0 386	2019-02-12	2019-06-12	FARM2HOU	30°20'50"S 51°14'35"W
RUFOUS-COLLARED SPARROW	M	SILVER.CETAS.IBAMA 2.8 0839	2019-02-12	2019-06-12	FARM2HOU	30°20'50"S 51°14'35"W
RUFOUS-COLLARED SPARROW	M	SILVER.IBAMA AO 133439	2019-02-12	2019-06-12	FARM2HOU	30°20'50"S 51°14'35"W
HOODED SISKIN	NI	RED.CETAS 2018 2018 2.2 04361	2019-02-12	2019-06-12	FARM2ENSTA	30°21'52"S 51°15'57"W
HOODED SISKIN	NI	RED.CETAS 2018 2.2 04362	2019-02-12	2019-06-12	FARM2ENSTA	30°21'52"S 51°15'57"W
HOODED SISKIN	M	RED.CETAS 2018 2.2 04363	2019-02-12	2019-06-12	FARM2ENSTA	30°21'52"S 51°15'57"W
HOODED SISKIN	M	RED.CETAS 2018 2.2 04364	2019-02-12	2019-06-12	FARM2ENSTA	30°21'52"S 51°15'57"W
HOODED SISKIN	NI	RED.CETAS 2018 2.2 04365	2019-02-12	2019-06-12	FARM2ENSTA	30°21'52"S 51°15'57"W
HOODED SISKIN	NI	RED.CETAS 2018 2.2 04366	2019-02-12	2019-06-12	FARM2ENSTA	30°21'52"S 51°15'57"W
HOODED SISKIN	M	RED.CETAS 2018 2.2 04367	2019-02-12	2019-06-12	FARM2ENSTA	30°21'52"S 51°15'57"W
HOODED SISKIN	NI	RED.CETAS 2018 2.2 04369	2019-02-12	2019-06-12	FARM2ENSTA	30°21'52"S 51°15'57"W
HOODED SISKIN	M	RED.CETAS 2018 2.2 04371	2019-02-12	2019-06-12	FARM2ENSTA	30°21'52"S 51°15'57"W
HOODED SISKIN	NI	RED.CETAS 2018 2.2 04372	2019-02-12	2019-06-12	FARM2ENSTA	30°21'52"S 51°15'57"W
HOODED SISKIN	M	RED.CETAS 2018 2.2 04376	2019-02-12	2019-06-12	FARM2ENSTA	30°21'52"S 51°15'57"W
HOODED SISKIN	NI	SILVER.CETAS.IBAMA 2.4 0512	2019-02-12	2019-06-12	FARM2ENSTA	30°21'52"S 51°15'57"W
HOODED SISKIN	M	GOLDEN.CEMAS-UFRGS 2.2 217	2019-02-12	2019-06-12	FARM2ENSTA	30°21'52"S 51°15'57"W
HOODED SISKIN	NI	RED.CEMAS-UFRGS 4.0 512	2019-02-12	2019-06-12	FARM2ENSTA	30°21'52"S 51°15'57"W
CHOPI BLACKBIRD	NI	SILVER.CETAS IBAMA RS 4.0 1435	2019-02-12	2019-06-12	FARM2ENSTA	30°21'52"S 51°15'57"W
DOUBLE-COLLARED SEEDEATER	M	GOLDEN.CEMAS-UFRGS 2.2 204	2019-02-12	2019-06-12	FARM2ENSTA	30°21'52"S 51°15'57"W
DOUBLE-COLLARED SEEDEATER	NI	GOLDEN.CEMAS-UFRGS 2.2 210	2019-02-12	2019-06-12	FARM2ENSTA	30°21'52"S 51°15'57"W
DOUBLE-COLLARED SEEDEATER	NI	SILVER.CETAS.IBAMA 30179	2019-02-12	2019-06-12	FARM2ENSTA	30°21'52"S 51°15'57"W
RUFOUS-COLLARED SPARROW	M	PURPLE.CEMAS-UFRGS 2.5 092	2019-02-12	2019-06-12	FARM2ENSTA	30°21'52"S 51°15'57"W
RUSTY-COLLARED SEEDEATER	M	RED.CETAS 2018 2.2 04319	2019-02-12	2019-06-12	FARM2ENSTA	30°21'52"S 51°15'57"W
RUSTY-COLLARED SEEDEATER	NI	RED.CETAS 2018 2.2 04328	2019-02-12	2019-06-12	FARM2ENSTA	30°21'52"S 51°15'57"W
RUSTY-COLLARED SEEDEATER	M	RED.CETAS 2018 2.2 04332	2019-02-12	2019-06-12	FARM2ENSTA	30°21'52"S 51°15'57"W
RUSTY-COLLARED SEEDEATER	M	RED.CETAS 2018 2.2 04335	2019-02-12	2019-06-12	FARM2ENSTA	30°21'52"S 51°15'57"W
RUSTY-COLLARED SEEDEATER	M	RED.CETAS 2018 2.2 04342	2019-02-12	2019-06-12	FARM2ENSTA	30°21'52"S 51°15'57"W
RUSTY-COLLARED SEEDEATER	NI	SILVER.CETAS.IBAMA 0376	2019-02-12	2019-06-12	FARM2ENSTA	30°21'52"S 51°15'57"W
RUSTY-COLLARED SEEDEATER	M	SILVER.CETAS.IBAMA 0379	2019-02-12	2019-06-12	FARM2ENSTA	30°21'52"S 51°15'57"W
RUSTY-COLLARED SEEDEATER	NI	SILVER.CETAS.IBAMA 0384	2019-02-12	2019-06-12	FARM2ENSTA	30°21'52"S 51°15'57"W
RUSTY-COLLARED SEEDEATER	NI	SILVER.CETAS.IBAMA 0394	2019-02-12	2019-06-12	FARM2ENSTA	30°21'52"S 51°15'57"W
RUSTY-COLLARED SEEDEATER	M	GOLDEN.CEMAS-UFRGS 2.2 219	2019-02-12	2019-06-12	FARM2ENSTA	30°21'52"S 51°15'57"W
RUSTY-COLLARED SEEDEATER	NI	GOLDEN.CEMAS-UFRGS 2.2 229	2019-02-12	2019-06-12	FARM2ENSTA	30°21'52"S 51°15'57"W
RUSTY-COLLARED SEEDEATER	M	GOLDEN.CEMAS-UFRGS 2.2 233	2019-02-12	2019-06-12	FARM2ENSTA	30°21'52"S 51°15'57"W
BLACK-RUFOUS WARBLING FINCH	NI	RED.CETAS 2018 2.6 08181	2019-02-12	2019-06-12	FARM2ENSTA	30°21'52"S 51°15'57"W
BLACK-RUFOUS WARBLING FINCH	M	RED.CETAS 2018 2.6 04365	2019-02-12	2019-06-12	FARM2ENSTA	30°21'52"S 51°15'57"W
BLACK-RUFOUS WARBLING FINCH	M	GOLDEN.CEMAS-UFRGS 2.6 272	2019-02-12	2019-06-12	FARM2ENSTA	30°21'52"S 51°15'57"W
GRASSLAND YELLOW FINCH	NI	GOLDEN.CEMAS-UFRGS 2.8 334	2019-02-12	2019-06-12	FARM2ENSTA	30°21'52"S 51°15'57"W
GRASSLAND YELLOW FINCH	M	GOLDEN.CEMAS-UFRGS 2.6 272	2019-02-12	2019-06-12	FARM2ENSTA	30°21'52"S 51°15'57"W
GUIRA TANAGER	M	GOLDEN.CEMAS-UFRGS 2.2 248	2019-02-12	2019-06-12	FARM2ENSTA	30°21'52"S 51°15'57"W
CHESTNUT-BACKED TANAGER	M	RED.CEMAS-UFRGS 3.0 379	2019-05-06	2019-07-12	FARM3WETL	30°22'49"S 51°15'28"W
DIADEMED TANAGER	M	SILVER.IBAMA 10-11 2.8 590	2019-05-06	2019-07-12	FARM3WETL	30°22'49"S 51°15'28"W
GOLDEN-WINGED CACIQUE	M	GOLDEN.CEMAS-UFRGS 3.5 464	2019-05-06	2019-07-12	FARM3WETL	30°22'49"S 51°15'28"W
UNIFORM FINCH	M	BLUE.CEMAS-UFRGS 2.5 026	2019-05-06	2019-07-12	FARM3WETL	30°22'49"S 51°15'28"W
UNIFORM FINCH	NI	GOLDEN.CEMAS-UFRGS 2.2 239	2019-05-06	2019-07-12	FARM3WETL	30°22'49"S 51°15'28"W
CHESTNUT-BELLIED SEED-FINCH	M	SILVER.SISPASS 2.6 005628	2019-05-06	2019-07-12	FARM3WETL	30°22'49"S 51°15'28"W
CHESTNUT-BELLIED SEED-FINCH	M	BLUE.CEMAS-UFRGS 2.5 030	2019-05-06	2019-07-12	FARM3WETL	30°22'49"S 51°15'28"W
CHESTNUT-BELLIED SEED-FINCH	NI	GOLDEN.CEMAS-UFRGS 2.6 257	2019-05-06	2019-07-12	FARM3WETL	30°22'49"S 51°15'28"W
CHESTNUT-BELLIED SEED-FINCH	M	RED.CETAS 2018 08245	2019-05-06	2019-07-12	FARM3WETL	30°22'49"S 51°15'28"W
CHESTNUT-BELLIED SEED-FINCH	M	GOLDEN.CEMAS-UFRGS 2.6 264	2019-05-06	2019-07-12	FARM3WETL	30°22'49"S 51°15'28"W
CHESTNUT-BELLIED SEED-FINCH	M	GOLDEN.CEMAS-UFRGS 3.0 382	2019-05-06	2019-07-12	FARM3WETL	30°22'49"S 51°15'28"W
CHESTNUT-BELLIED SEED-FINCH	M	BLUE.CEMAS-UFRGS 2.5 027	2019-05-06	2019-07-12	FARM3WETL	30°22'49"S 51°15'28"W
CHESTNUT-BELLIED SEED-FINCH	NI	GOLDEN.CEMAS-UFRGS 2.8 319	2019-05-06	2019-07-12	FARM3WETL	30°22'49"S 51°15'28"W
CHESTNUT-BELLIED SEED-FINCH	NI	GOLDEN.CEMAS-UFRGS 2.6 260	2019-05-06	2019-07-12	FARM3WETL	30°22'49"S 51°15'28"W
BUFFY-FRONTED SEEDEATER	NI	SILVER.SISPASS.RSA 2.6 0034	2019-05-06	2019-10-11	SÃO JOÃO DO SUL/SC	30°36'45"S 51°26'61"O
BUFFY-FRONTED SEEDEATER	NI	SILVER.IBAMA OA 297254	2019-05-06	2019-10-11	SÃO JOÃO DO SUL/SC	30°36'45"S 51°26'61"O
BUFFY-FRONTED SEEDEATER	M	GOLDEN.CEMAS-UFRGS 2.5 090	2019-05-06	2019-10-11	SÃO JOÃO DO SUL/SC	30°36'45"S 51°26'61"O
BUFFY-FRONTED SEEDEATER	M	SILVER.SISPASS.RSA 2.6 2604	2019-05-06	2019-10-11	SÃO JOÃO DO SUL/SC	30°36'45"S 51°26'61"O
BUFFY-FRONTED SEEDEATER	M	SILVER.SISPASS.RSA 2.6 00311	2019-05-06	2019-10-11	SÃO JOÃO DO SUL/SC	30°36'45"S 51°26'61"O
BUFFY-FRONTED SEEDEATER	M	BLUE.CEMAS-UFRGS 2.5 25	2019-05-06	2019-10-11	SÃO JOÃO DO SUL/SC	30°36'45"S 51°26'61"O
BUFFY-FRONTED SEEDEATER	NI	SILVER.SISPASS.RSA 2.6 007326	2019-05-06	2019-10-11	SÃO JOÃO DO SUL/SC	30°36'45"S 51°26'61"O
BUFFY-FRONTED SEEDEATER	M	SILVER.SISPASS.RSA 2.6 001602	2019-05-06	2019-10-11	SÃO JOÃO DO SUL/SC	30°36'45"S 51°26'61"O
BLUE-YELLOW TANAGER	NI	SILVER.CETAS.IBAMA 3.2 30780	2019-05-06	2019-07-17	CEMASUFRGS	30°04'27"S 51°07'35"W
SAYACA TANAGER	NI	SILVER.CETAS.IBAMA 3.2 30781	2019-05-06	2019-07-17	CEMASUFRGS	30°04'27"S 51°07'35"W
CHESTNUT-BELLIED EUPHONIA	NI	GOLDEN.CEMAS-UFRGS 2.5 101	2019-05-06	2019-07-17	CEMASUFRGS	30°04'27"S 51°07'35"W
BLUE-YELLOW TANAGER	M	SILVER.CETAS.IBAMA 3.2 30360	2019-05-06	2019-07-17	CEMASUFRGS	30°04'27"S 51°07'35"W
BLUE-YELLOW TANAGER	M	SILVER.CETAS.IBAMA 3.2 30359	2019-05-06	2019-07-17	CEMASUFRGS	30°04'27"S 51°07'35"W
BLUE-YELLOW TANAGER	M	SILVER.CETAS.IBAMA 3.2 30302	2019-05-06	2019-07-17	CEMASUFRGS	30°04'27"S 51°07'35"W
RUBY-CROWNED TANAGER	NI	SILVER.CETAS.IBAMA 2.8 0707	2019-05-06	2019-07-17	CEMASUFRGS	30°04'27"S 51°07'35"W
RUBY-CROWNED TANAGER	M	SILVER.CETAS.IBAMA 2.8 0708	2019-05-06	2019-07-17	CEMASUFRGS	30°04'27"S 51°07'35"W
BLUE-YELLOW TANAGER	M	RED.CETAS 2018 3.8 01655	2019-05-06	2019-07-17	CEMASUFRGS	30°04'27"S 51°07'35"W
BLUE-YELLOW TANAGER	M	RED.CETAS 2018 3.8 06802	2019-05-06	2019-07-17	CEMASUFRGS	30°04'27"S 51°07'35"W
SAYACA TANAGER	NI	RED.CETAS 2018 3.0 04649	2019-05-06	2019-07-17	CEMASUFRGS	30°04'27"S 51°07'35"W
CREAMY-BELLIED THRUSH	NI	SILVER.CETAS.IBAMA 4.5 1509	2019-05-06	2019-07-17	CEMASUFRGS	30°04'27"S 51°07'35"W
CREAMY-BELLIED THRUSH	NI	SILVER.CETAS.IBAMA 3.8 01659	2019-05-06	2019-07-17	CEMASUFRGS	30°04'27"S 51°07'35"W
RUFOUS-BELLIED THRUSH	NI	SILVER.CETAS.IBAMA 4.5 1508	2019-05-06	2019-07-17	CEMASUFRGS	30°04'27"S 51°07'35"W
RUBY-CROWNED TANAGER	M	RED.CETAS 2018 2.8 08744	2019-05-06	2019-07-17	CEMASUFRGS	30°04'27"S 51°07'35"W
RUBY-CROWNED TANAGER	M	RED.CETAS 2018 3.0 02243	2019-05-06	2019-07-17	CEMASUFRGS	30°04'27"S 51°07'35"W
RUFOUS-COLLARED SPARROW	M	BLUE.CEMAS-UFRGS 2.5 037	2019-05-06	2019-07-17	CEMASUFRGS	30°04'27"S 51°07'35"W
HOODED SISKIN	NI	GOLDEN.CEMAS-UFRGS 2.5 003	2019-09-23	2019-12-13	FARM4	30°10'21"S 51°00'14"W
DOUBLE-COLLARED SEEDEATER	M	SILVER.SISPASS 2.2 001548	2019-09-23	2019-12-13	FARM4	30°10'21"S 51°00'14"W
DOUBLE-COLLARED SEEDEATER	NI	GOLDEN.CEMAS-UFRGS 2.2 228	2019-09-23	2019-12-13	FARM4	30°10'21"S 51°00'14"W
DOUBLE-COLLARED SEEDEATER	M	RED.CETAS 2018 2.0 03980	2019-09-23	2019-12-13	FARM4	30°10'21"S 51°00'14"W
DOUBLE-COLLARED SEEDEATER	M	GOLDEN.CEMAS-UFRGS 2.2 218	2019-09-23	2019-12-13	FARM4	30°10'21"S 51°00'14"W
CHESTNUT-BELLIED SEED-FINCH	M	SILVER.IBAMA OA 2.6 285637	2019-09-23	2019-12-13	FARM4	30°10'21"S 51°00'14"W
RUBY-CROWNED TANAGER	M	RED.CEMAS-UFRGS 3.0 402	2019-09-23	2019-12-13	FARM4	30°10'21"S 51°00'14"W
DIADEMED TANAGER	M	SILVER.CETAS.IBAMA 3.2 30345	2019-09-23	2019-12-13	FARM4	30°10'21"S 51°00'14"W
DIADEMED TANAGER	M	SILVER.CETAS.IBAMA 3.2 30362	2019-09-23	2019-12-13	FARM4	30°10'21"S 51°00'14"W
RUFOUS-COLLARED SPARROW	NI	GOLDEN.CEMAS-UFRGS 3.0 176	2019-09-23	2019-12-14	FARM3PADD1	30°22'17"S 51°15'40"W
RUFOUS-COLLARED SPARROW	M	GOLDEN.CEMAS-UFRGS 3.0 176	2019-09-23	2019-12-14	FARM3PADD1	30°22'17"S 51°15'40"W
RUFOUS-COLLARED SPARROW	M	BLUE.CEMAS-UFRGS 2.5 032	2019-09-23	2019-12-14	FARM3PADD1	30°22'17"S 51°15'40"W
RUFOUS-COLLARED SPARROW	NI	SILVER.CETAS.IBAMA 2.8 0713	2019-09-23	2019-12-14	FARM3PADD1	30°22'17"S 51°15'40"W
RUFOUS-COLLARED SPARROW	M	SILVER.CETAS.IBAMA 2.8 0726	2019-09-23	2019-12-14	FARM3PADD1	30°22'17"S 51°15'40"W
RUFOUS-COLLARED SPARROW	M	BLUE.CEMAS-UFRGS 2.5 034	2019-09-23	2019-12-14	FARM3PADD1	30°22'17"S 51°15'40"W
RUFOUS-COLLARED SPARROW	NI	PURPLE.CEMAS-UFRGS 2.5 090	2019-09-23	2019-12-14	FARM3PADD1	30°22'17"S 51°15'40"W
RUSTY-COLLARED SEEDEATER	M	RED.CETAS 2018 2.2 04450	2019-09-23	2019-12-14	FARM3PADD1	30°22'17"S 51°15'40"W
DOUBLE-COLLARED SEEDEATER	M	RED.CETAS 2018 2.2 05500	2019-09-23	2019-12-14	FARM3PADD1	30°22'17"S 51°15'40"W
DOUBLE-COLLARED SEEDEATER	NI	SILVER.CETAS.IBAMA 2.4 013873	2019-09-23	2019-12-14	FARM3PADD1	30°22'17"S 51°15'40"W
DOUBLE-COLLARED SEEDEATER	M	SILVER.SISPASS RSA 2.2 001369	2019-09-23	2019-12-14	FARM3PADD1	30°22'17"S 51°15'40"W
DOUBLE-COLLARED SEEDEATER	M	SILVER.CETAS.IBAMA 2.5 063	2019-09-23	2019-12-14	FARM3PADD1	30°22'17"S 51°15'40"W
DOUBLE-COLLARED SEEDEATER	M	RED.CETAS 2018 2.2 03997	2019-09-23	2019-12-14	FARM3PADD1	30°22'17"S 51°15'40"W
DOUBLE-COLLARED SEEDEATER	M	SILVER.IBAMA OA 2.2 321950	2019-09-23	2019-12-14	FARM3PADD1	30°22'17"S 51°15'40"W
DOUBLE-COLLARED SEEDEATER	NI	SILVER.CETAS.IBAMA 2.0 0200	2019-09-23	2019-12-14	FARM3PADD1	30°22'17"S 51°15'40"W
CHESTNUT-BELLIED SEED-FINCH	M	SILVER-IBAMA OA 2.6 381485	2019-09-23	2019-12-14	FARM3PADD1	30°22'17"S 51°15'40"W
CHESTNUT-BELLIED SEED-FINCH	M	SILVER.SISPASS RSA 2.6 004313	2019-09-23	2019-12-14	FARM3PADD1	30°22'17"S 51°15'40"W
CHESTNUT-BELLIED SEED-FINCH	M	SILVER.SISPASS RSA 2.6 005690	2019-09-23	2019-12-14	FARM3PADD1	30°22'17"S 51°15'40"W
CHESTNUT-BELLIED SEED-FINCH	NI	SILVER.SISPASS SCA 2.6 033786	2019-09-23	2019-12-14	FARM3PADD1	30°22'17"S 51°15'40"W
CHESTNUT-BELLIED SEED-FINCH	NI	SILVER.SISPASS RSA 2.6 004312	2019-09-23	2019-12-14	FARM3PADD1	30°22'17"S 51°15'40"W
DIADEMED TANAGER	M	SILVER.CETAS.IBAMA 3.2 30790	2019-09-23	2019-12-14	FARM3PADD1	30°22'17"S 51°15'40"W
DIADEMED TANAGER	NI	GOLDEN.CEMAS-UFRGS 3.0 175	2019-09-23	2019-12-14	FARM3PADD1	30°22'17"S 51°15'40"W
DIADEMED TANAGER	M	BLUE.CEMAS-UFRGS 3.0 214	2019-09-23	2019-12-14	FARM3PADD1	30°22'17"S 51°15'40"W
DIADEMED TANAGER	M	RED.CEMAS-UFRGS 3.0 415	2019-09-23	2019-12-14	FARM3PADD1	30°22'17"S 51°15'40"W
DIADEMED TANAGER	M	SILVER.CETAS.IBAMA 3.2 30365	2019-09-23	2019-12-14	FARM3PADD1	30°22'17"S 51°15'40"W
BLACK-RUFOUS WARBLING FINCH	M	RED.CETAS 2018 2.5 12494	2019-09-23	2019-12-14	FARM3PADD1	30°22'17"S 51°15'40"W
DOUBLE-COLLARED SEEDEATER	NI	SILVER.SISPASS 2.2 286197	2019-09-30	2019-12-19	FARM1.1	30°03'52"S 51°36'34"W
DOUBLE-COLLARED SEEDEATER	NI	SILVER.IBAMA OA 2.2 071687	2019-09-30	2019-12-19	FARM1.1	30°03'52"S 51°36'34"W
DOUBLE-COLLARED SEEDEATER	M	SILVER.CETAS.IBAMA 2.2 0199	2019-09-30	2019-12-19	FARM1.1	30°03'52"S 51°36'34"W
DOUBLE-COLLARED SEEDEATER	M	SILVER.CEMAS-UFRGS 2.5 061	2019-09-30	2019-12-19	FARM1.1	30°03'52"S 51°36'34"W
RUFOUS-COLLARED SPARROW	M	PURPLE.CEMAS-UFRGS 2.5 097	2019-09-30	2019-12-19	FARM1.1	30°03'52"S 51°36'34"W
RUFOUS-COLLARED SPARROW	M	SILVER.CETAS.IBAMA 2.8 0839	2019-09-30	2019-12-19	FARM1.1	30°03'52"S 51°36'34"W
RUFOUS-COLLARED SPARROW	NI	SILVER.CETAS.IBAMA 2.8 0750	2019-09-30	2019-12-19	FARM1.1	30°03'52"S 51°36'34"W
RUFOUS-COLLARED SPARROW	M	GOLDEN.CEMAS-UFRGS 3.0 179	2019-09-30	2019-12-19	FARM1.1	30°03'52"S 51°36'34"W
RUFOUS-COLLARED SPARROW	M	GREEN.CEMAS-UFRGS 2.5 117	2019-09-30	2019-12-19	FARM1.1	30°03'52"S 51°36'34"W
GLAUCUS-BLUE GROSBEAK	M	RED.CETAS 2018 2.4 12490	2019-09-30	2019-12-19	FARM1.1	30°03'52"S 51°36'34"W
BLUE-BLACK GRASSQUIT	NI	GOLDEN.CEMAS-UFRGS 2.2 244	2019-09-30	2019-12-19	FARM1.1	30°03'52"S 51°36'34"W
DOUBLE-COLLARED SEEDEATER	M	SILVER.CETAS.IBAMA 2.0 0198	2019-09-30	2019-12-19	FARM1.1	30°03'52"S 51°36'34"W
DOUBLE-COLLARED SEEDEATER	NI	SILVER.CEMAS-UFRGS 2.5 064	2019-09-30	2019-12-19	FARM1.1	30°03'52"S 51°36'34"W
DOUBLE-COLLARED SEEDEATER	M	SILVER.IBAMA OA 2.2 015950	2019-09-30	2019-12-19	FARM1.1	30°03'52"S 51°36'34"W
DOUBLE-COLLARED SEEDEATER	M	SILVER.SISPASS RSA 2.2 001372	2019-09-30	2019-12-19	FARM1.1	30°03'52"S 51°36'34"W
RUSTY-COLLARED SEEDEATER	NI	RED.CETAS 2018 2.2 04317	2019-09-30	2019-12-19	FARM1.1	30°03'52"S 51°36'34"W
UNIFORM FINCH	NI	RED.CETAS 2018 2.4 12499	2019-09-30	2019-12-19	FARM1.1	30°03'52"S 51°36'34"W
DIADEMED TANAGER	NI	BLUE.CEMAS-UFRGS 3.0 181	2019-09-30	2019-12-19	FARM1.1	30°03'52"S 51°36'34"W
DIADEMED TANAGER	M	BLUE.CEMAS-UFRGS 3.0 182	2019-09-30	2019-12-19	FARM1.1	30°03'52"S 51°36'34"W
RUSTY-COLLARED SEEDEATER	NI	SILVER.CEMAS-UFRGS 2.5 062	2019-09-30	2019-12-19	FARM1.1	30°03'52"S 51°36'34"W
RUFOUS-COLLARED SPARROW	M	PURPLE.CEMAS-UFRGS 2.5 095	2019-09-30	2019-12-19	FARM1.1	30°03'52"S 51°36'34"W
RUFOUS-COLLARED SPARROW	NI	BLUE.CEMAS-UFRGS 2.5 035	2019-09-30	2019-12-19	FARM1.1	30°03'52"S 51°36'34"W
RUFOUS-COLLARED SPARROW	M	GREEN.CEMAS-UFRGS 2.5 110	2019-09-30	2019-12-19	FARM1.1	30°03'52"S 51°36'34"W
RUFOUS-COLLARED SPARROW	M	PURPLE.CEMAS-UFRGS 2.5 094	2019-09-30	2019-12-19	FARM1.1	30°03'52"S 51°36'34"W
RUFOUS-COLLARED SPARROW	M	GREEN.CEMAS-UFRGS 2.5 109	2019-09-30	2019-12-19	FARM1.1	30°03'52"S 51°36'34"W
GOLDEN-WINGED CACIQUE	M	GOLDEN.CEMAS-UFRGS 3.5 554	2019-09-30	2019-12-19	FARM1.1	30°03'52"S 51°36'34"W
CHESTNUT-BELLIED EUPHONIA	M	GOLDEN.CEMAS-UFRGS 2.5 055	2019-09-23	2020-01-02	FARM1.2	30°03'54"S 51°35'50"W
CHESTNUT-BELLIED EUPHONIA	M	GOLDEN.CEMAS-UFRGS 2.5 056	2019-09-23	2020-01-02	FARM1.2	30°03'54"S 51°35'50"W
GLAUCUS-BLUE GROSBEAK	NI	GOLDEN.CEMAS-UFRGS 2.5 009	2019-09-23	2020-01-02	FARM1.2	30°03'54"S 51°35'50"W
GLAUCUS-BLUE GROSBEAK	M	BLUE.CEMAS UFRGS 2.5 184	2019-09-23	2020-01-02	FARM1.2	30°03'54"S 51°35'50"W
GLAUCUS-BLUE GROSBEAK	M	RED.CETAS 2018 2.4 12497	2019-09-23	2020-01-02	FARM1.2	30°03'54"S 51°35'50"W
GLAUCUS-BLUE GROSBEAK	NI	RED.CETAS 2018 2.5 12498	2019-09-23	2020-01-02	FARM1.2	30°03'54"S 51°35'50"W
RUFOUS-COLLARED SPARROW	M	GREEN.CEMAS-UFRGS 2.5 115	2019-09-23	2020-01-02	FARM1.2	30°03'54"S 51°35'50"W
DOUBLE-COLLARED SEEDEATER	M	SILVER.IBAMA OA 2.2 077202	2019-09-23	2020-01-02	FARM1.2	30°03'54"S 51°35'50"W
DOUBLE-COLLARED SEEDEATER	M	SILVER.IBAMA OA 2.2 286180	2019-09-23	2020-01-02	FARM1.2	30°03'54"S 51°35'50"W
DOUBLE-COLLARED SEEDEATER	M	SILVER.IBAMA OA 2.2 24552	2019-09-23	2020-01-02	FARM1.2	30°03'54"S 51°35'50"W
DOUBLE-COLLARED SEEDEATER	NI	RED.CETAS 2018 2.2 07947	2019-09-23	2020-01-02	FARM1.2	30°03'54"S 51°35'50"W
DOUBLE-COLLARED SEEDEATER	M	SILVER.CEMAS-UFRGS 2.5 067	2019-09-23	2020-01-02	FARM1.2	30°03'54"S 51°35'50"W
CHESTNUT-BELLIED SEED-FINCH	M	SILVER.CETAS.IBAMA 2.6 381485	2019-09-23	2020-01-02	FARM1.2	30°03'54"S 51°35'50"W
CHESTNUT-BELLIED SEED-FINCH	NI	SILVER.SISPASS 2.8 1672	2019-09-23	2020-01-02	FARM1.2	30°03'54"S 51°35'50"W
CHESTNUT-BELLIED SEED-FINCH	M	SILVER.SISPASS 2.5 7019	2019-09-23	2020-01-02	FARM1.2	30°03'54"S 51°35'50"W
GRASSLAND YELLOW FINCH	M	RED.CETAS 2018 2.2 07948	2019-09-23	2020-01-02	FARM1.2	30°03'54"S 51°35'50"W
YELLOW-BILLED CARDINAL	NI	RED.CETAS 2018 2.5 01946	2019-09-30	2020-01-09	BARRA DO QUARAÍ/RS	30°13'12"S 57°33'01"O
YELLOW-BILLED CARDINAL	NI	RED.CEMAS-UFRGS 2.5 01947	2019-09-30	2020-01-09	BARRA DO QUARAÍ/RS	30°13'12"S 57°33'01"O
YELLOW-BILLED CARDINAL	NI	RED.CETAS 2018 2.5 01949	2019-09-30	2020-01-09	BARRA DO QUARAÍ/RS	30°13'12"S 57°33'01"O
YELLOW-BILLED CARDINAL	NI	RED.CETAS 2018 2.5 01950	2019-09-30	2020-01-09	BARRA DO QUARAÍ/RS	30°13'12"S 57°33'01"O
YELLOW-BILLED CARDINAL	NI	RED.CETAS 2018 2.5 01948	2019-09-30	2020-01-09	BARRA DO QUARAÍ/RS	30°13'12"S 57°33'01"O
MARSH SEEDEATER	M	RED.CETAS 2018 2.2 04489	2019-09-30	2020-01-09	BARRA DO QUARAÍ/RS	30°13'12"S 57°33'01"O
MARSH SEEDEATER	NI	GOLDEN.CEMAS-UFRGS 2.2 246	2019-09-30	2020-01-09	BARRA DO QUARAÍ/RS	30°13'12"S 57°33'01"O
PEARLY-BELLIED SEEDEATER	M	SILVER.SISPASS RSA 2.2 0003999	2019-09-30	2020-01-09	BARRA DO QUARAÍ/RS	30°13'12"S 57°33'01"O
PEARLY-BELLIED SEEDEATER	M	GOLDEN.CEMAS-UFRGS 2.5 053	2019-09-30	2020-01-09	BARRA DO QUARAÍ/RS	30°13'12"S 57°33'01"O
PEARLY-BELLIED SEEDEATER	M	RED.CETAS 2018 2.4 0082	2019-09-30	2020-01-09	BARRA DO QUARAÍ/RS	30°13'12"S 57°33'01"O
PEARLY-BELLIED SEEDEATER	M	RED.CETAS 2018 2.2 04116	2019-09-30	2020-01-09	BARRA DO QUARAÍ/RS	30°13'12"S 57°33'01"O
COMMON WAXBILL	M	SILVER.CETAS.IBAMA 2.0 0060	2020-01-23	2020-04-20	FARM1WETL	30°03'03"S 51°36'06"W
COMMON WAXBILL	NI	SILVER.CETAS.IBAMA 2.0 0057	2020-01-23	2020-04-20	FARM1WETL	30°03'03"S 51°36'06"W
COMMON WAXBILL	NI	SILVER.CETAS.IBAMA 2.0 0058	2020-01-23	2020-04-20	FARM1WETL	30°03'03"S 51°36'06"W
COMMON WAXBILL	NI	SILVER.CETAS.IBAMA 2.0 0191	2020-01-23	2020-04-20	FARM1WETL	30°03'03"S 51°36'06"W
COMMON WAXBILL	M	SILVER.CETAS.IBAMA 2.0 0193	2020-01-23	2020-04-20	FARM1WETL	30°03'03"S 51°36'06"W
COMMON WAXBILL	NI	SILVER.CETAS.IBAMA 2.0 0152	2020-01-23	2020-04-20	FARM1WETL	30°03'03"S 51°36'06"W
COMMON WAXBILL	M	SILVER.CETAS.IBAMA 2.0 0195	2020-01-23	2020-04-20	FARM1WETL	30°03'03"S 51°36'06"W
COMMON WAXBILL	NI	SILVER.CETAS.IBAMA 2.0 0188	2020-01-23	2020-04-20	FARM1WETL	30°03'03"S 51°36'06"W
DOUBLE-COLLARED SEEDEATER	M	SILVER.CETAS.IBAMA 2.0 0179	2020-01-23	2020-04-20	FARM1WETL	30°03'03"S 51°36'06"W
DOUBLE-COLLARED SEEDEATER	M	SILVER.CETAS.IBAMA 2.0 0176	2020-01-23	2020-04-20	FARM1WETL	30°03'03"S 51°36'06"W
DOUBLE-COLLARED SEEDEATER	M	SILVER.CETAS.IBAMA 2.0 0070	2020-01-23	2020-04-20	FARM1WETL	30°03'03"S 51°36'06"W
HOODED SISKIN	NI	SILVER.CETAS.IBAMA 2.0 0061	2020-01-23	2020-04-20	FARM1WETL	30°03'03"S 51°36'06"W
HOODED SISKIN	M	SILVER.CETAS.IBAMA 2.0 0174	2020-01-23	2020-04-20	FARM1WETL	30°03'03"S 51°36'06"W
RUFOUS-COLLARED SPARROW	M	RED.CETAS 2018 2.6 11662	2020-01-23	2020-04-20	FARM1WETL	30°03'03"S 51°36'06"W
GRASSLAND YELLOW FINCH	M	RED.CETAS 2018 2.5 01907	2020-01-23	2020-04-20	FARM1WETL	30°03'03"S 51°36'06"W
GRASSLAND YELLOW FINCH	NI	RED.CETAS 2018 2.5 01903	2020-01-23	2020-04-20	FARM1WETL	30°03'03"S 51°36'06"W
COMMON WAXBILL	M	SILVER.CETAS.IBAMA 2.0 0055	2020-01-23	2020-04-20	FARM1WETL	30°03'03"S 51°36'06"W
SAYACA TANAGER	M	BLUE.CEMAS-UFRGS 3.0 197	2020-01-22	2020-04-20	FARM1WETL	30°03'03"S 51°36'06"W
BLUE-YELLOW TANAGER	M	SILVER.CETAS.IBAMA 3.8 1034	2020-01-22	2020-04-20	FARM1WETL	30°03'03"S 51°36'06"W
RUBY-CROWNED TANAGER	M	BLUE.CEMAS-UFRGS 3.0 190	2020-01-22	2020-04-20	FARM1WETL	30°03'03"S 51°36'06"W
COMMON WAXBILL	M	SILVER.CETAS.IBAMA 2.0 0051	2020-01-21	2020-04-20	FARM1WETL	30°03'03"S 51°36'06"W
COMMON WAXBILL	M	SILVER.CETAS.IBAMA 2.0 0059	2020-01-21	2020-04-20	FARM1WETL	30°03'03"S 51°36'06"W
COMMON WAXBILL	NI	SILVER.CETAS.IBAMA 2.0 0056	2020-01-22	2020-04-20	FARM1WETL	30°03'03"S 51°36'06"W
COMMON WAXBILL	NI	SILVER.CETAS.IBAMA 2.0 0053	2020-01-22	2020-04-20	FARM1WETL	30°03'03"S 51°36'06"W
CHESTNUT-BELLIED SEED-FINCH	M	SILVER.CETAS.IBAMA 2.0 0173	2020-01-22	2020-04-20	FARM1WETL	30°03'03"S 51°36'06"W
CHESTNUT-BELLIED SEED-FINCH	M	SILVER.SISPASS RSA 2.5 00840	2020-01-22	2020-04-20	FARM1WETL	30°03'03"S 51°36'06"W
CHESTNUT-BELLIED SEED-FINCH	M	SILVER.SISPASS SCA 2.6 0370	2020-01-21	2020-04-20	FARM1WETL	30°03'03"S 51°36'06"W
CHESTNUT-BELLIED SEED-FINCH	M	RED.CETAS 2018 2.6 11700	2020-01-21	2020-04-20	FARM1WETL	30°03'03"S 51°36'06"W
CHESTNUT-BELLIED SEED-FINCH	M	SILVER.SISPASS RSA 2.5 6854	2020-01-22	2020-04-20	FARM1WETL	30°03'03"S 51°36'06"W
CHESTNUT-BELLIED SEED-FINCH	M	SILVER.SISPASS RSA 2.5 6422	2020-01-22	2020-04-20	FARM1WETL	30°03'03"S 51°36'06"W
CHESTNUT-BELLIED SEED-FINCH	M	SILVER.IBAMA OA 2.6 680025	2020-01-22	2020-04-20	FARM1WETL	30°03'03"S 51°36'06"W
CHESTNUT-BELLIED SEED-FINCH	M	SILVER.SISPASS RSA 2.6 00012	2020-01-22	2020-04-20	FARM1WETL	30°03'03"S 51°36'06"W
CHESTNUT-BELLIED SEED-FINCH	NI	SILVER.CETAS. IBAMA 2.0 0170	2020-01-21	2020-04-20	FARM1WETL	30°03'03"S 51°36'06"W
CHESTNUT-BELLIED SEED-FINCH	M	GOLDEN.CEMAS-UFRGS 2.5 016	2020-01-21	2020-04-20	FARM1WETL	30°03'03"S 51°36'06"W
CHESTNUT-BELLIED SEED-FINCH	M	SILVER.CETAS.IBAMA 2.0 0171	2020-01-21	2020-04-20	FARM1WETL	30°03'03"S 51°36'06"W
CHESTNUT-BELLIED SEED-FINCH	NI	SILVER.CETAS.IBAMA 2.0 0172	2020-01-22	2020-04-20	FARM1WETL	30°03'03"S 51°36'06"W
CHESTNUT-BELLIED SEED-FINCH	M	SILVER.SISPASS SCA 2.6 OA 3690	2020-01-22	2020-04-20	FARM1WETL	30°03'03"S 51°36'06"W
CHESTNUT-BELLIED SEED-FINCH	NI	RED.CETAS 2018 2.6 12326	2020-01-22	2020-04-20	FARM1WETL	30°03'03"S 51°36'06"W
DOUBLE-COLLARED SEEDEATER	M	SILVER.SISPASS RJA 2.0 010722	2020-01-22	2020-04-20	FARM1WETL	30°03'03"S 51°36'06"W
DOUBLE-COLLARED SEEDEATER	NI	RED.CETAS 2018 RS 2.2 04468	2020-01-21	2020-04-20	FARM1WETL	30°03'03"S 51°36'06"W
DOUBLE-COLLARED SEEDEATER	NI	RED.CETAS 2018 RS 2.4 08601	2020-01-21	2020-04-20	FARM1WETL	30°03'03"S 51°36'06"W
DOUBLE-COLLARED SEEDEATER	M	RED.CETAS 2018 RS 2.4 12456	2020-01-22	2020-04-20	FARM1WETL	30°03'03"S 51°36'06"W
DOUBLE-COLLARED SEEDEATER	M	SILVER.CETAS.IBAMA 2.0 0154	2020-01-22	2020-04-20	FARM1WETL	30°03'03"S 51°36'06"W
DOUBLE-COLLARED SEEDEATER	M	SILVER.CETAS.IBAMA 2.0 0116	2020-01-22	2020-04-20	FARM1WETL	30°03'03"S 51°36'06"W
DOUBLE-COLLARED SEEDEATER	NI	SILVER.CETAS.IBAMA 2.0 018	2020-01-22	2020-04-20	FARM1WETL	30°03'03"S 51°36'06"W
DOUBLE-COLLARED SEEDEATER	M	RED.CETAS 2018 RS 2.5 01987	2020-01-21	2020-04-20	FARM1WETL	30°03'03"S 51°36'06"W
DOUBLE-COLLARED SEEDEATER	M	SILVER.CETAS.IBAMA 2.0 0180	2020-01-21	2020-04-20	FARM1WETL	30°03'03"S 51°36'06"W
DOUBLE-COLLARED SEEDEATER	M	RED.CETAS 2018 RS 2.0 12453	2020-01-22	2020-04-25	FARM2ENSTA	30°21'52"S 51°15'57"W
DOUBLE-COLLARED SEEDEATER	M	SILVER.CETAS.IBAMA 2.0 0157	2020-01-22	2020-04-25	FARM2ENSTA	30°21'52"S 51°15'57"W
DOUBLE-COLLARED SEEDEATER	M	RED.CETAS 2018 RS 2.5 01988	2020-01-22	2020-04-25	FARM2ENSTA	30°21'52"S 51°15'57"W
DOUBLE-COLLARED SEEDEATER	M	SILVER.CETAS.IBAMA 2.0 0190	2020-01-22	2020-04-25	FARM2ENSTA	30°21'52"S 51°15'57"W
DOUBLE-COLLARED SEEDEATER	M	SILVER.CETAS.IBAMA 2.0 0153	2020-01-21	2020-04-25	FARM2ENSTA	30°21'52"S 51°15'57"W
DOUBLE-COLLARED SEEDEATER	M	SILVER.CETAS.IBAMA 2.0 0159	2020-01-21	2020-04-25	FARM2ENSTA	30°21'52"S 51°15'57"W
DOUBLE-COLLARED SEEDEATER	M	SILVER. IBAMA OA 2.2 237268	2020-01-21	2020-04-25	FARM2ENSTA	30°21'52"S 51°15'57"W
DOUBLE-COLLARED SEEDEATER	M	SILVER.IBAMA OA 2.2 099629	2020-01-22	2020-04-25	FARM2ENSTA	30°21'52"S 51°15'57"W
DOUBLE-COLLARED SEEDEATER	M	SILVER.CETAS.IBAMA 2.0 0177	2020-01-22	2020-04-25	FARM2ENSTA	30°21'52"S 51°15'57"W
DOUBLE-COLLARED SEEDEATER	NI	RED.CETAS 2018 RS 2.4 08602	2020-01-22	2020-04-25	FARM2ENSTA	30°21'52"S 51°15'57"W
DOUBLE-COLLARED SEEDEATER	M	SILVER.CETAS.IBAMA 2.0 0156	2020-01-22	2020-04-25	FARM2ENSTA	30°21'52"S 51°15'57"W
DOUBLE-COLLARED SEEDEATER	NI	SILVER.CETAS.IBAMA 2.0 0165	2020-01-21	2020-04-25	FARM2ENSTA	30°21'52"S 51°15'57"W
DOUBLE-COLLARED SEEDEATER	M	SILVER.IBAMA OA 2.2 312213	2020-01-21	2020-04-25	FARM2ENSTA	30°21'52"S 51°15'57"W
DOUBLE-COLLARED SEEDEATER	M	SILVER.SISPASS 2.2 004620	2020-01-22	2020-04-25	FARM2ENSTA	30°21'52"S 51°15'57"W
DOUBLE-COLLARED SEEDEATER	M	SILVER.CETAS.IBAMA 2.0 0167	2020-01-21	2020-04-25	FARM2ENSTA	30°21'52"S 51°15'57"W
DOUBLE-COLLARED SEEDEATER	M	SILVER.CETAS.IBAMA 2.0 0183	2020-01-21	2020-04-25	FARM2ENSTA	30°21'52"S 51°15'57"W
DOUBLE-COLLARED SEEDEATER	M	SILVER.CETAS.IBAMA 2.0 0160	2020-01-22	2020-04-25	FARM2ENSTA	30°21'52"S 51°15'57"W
RUSTY-COLLARED SEEDEATER	M	RED.CETAS 2018 2.5 01959	2020-01-22	2020-04-25	FARM2ENSTA	30°21'52"S 51°15'57"W
RUSTY-COLLARED SEEDEATER	M	SILVER.CETAS.IBAMA 2.0 0178	2020-01-22	2020-04-25	FARM2ENSTA	30°21'52"S 51°15'57"W
RUSTY-COLLARED SEEDEATER	M	RED.CETAS 2018 2.5 01958	2020-01-22	2020-04-25	FARM2ENSTA	30°21'52"S 51°15'57"W
RUSTY-COLLARED SEEDEATER	NI	RED.CETAS 2018 2.4 8603	2020-01-21	2020-04-25	FARM2ENSTA	30°21'52"S 51°15'57"W
RUSTY-COLLARED SEEDEATER	M	GOLDEN.CEMAS-UFRGS 2.5 011	2020-01-21	2020-04-25	FARM2ENSTA	30°21'52"S 51°15'57"W
RUSTY-COLLARED SEEDEATER	M	RED.CETAS 2018 2.2 04317	2020-01-22	2020-04-25	FARM2ENSTA	30°21'52"S 51°15'57"W
RUSTY-COLLARED SEEDEATER	M	SILVER.CETAS.IBAMA 2.0 0155	2020-01-22	2020-04-25	FARM2ENSTA	30°21'52"S 51°15'57"W
DIADEMED TANAGER	M	BLUE.CEMAS-UFRGS 3.0 202	2020-01-22	2020-04-25	FARM2ENSTA	30°21'52"S 51°15'57"W
DIADEMED TANAGER	M	BLUE.CEMAS-UFRGS 3.0 206	2020-01-22	2020-04-25	FARM2ENSTA	30°21'52"S 51°15'57"W
DIADEMED TANAGER	M	RED.CETAS 2018 3.0 02276	2020-01-21	2020-04-25	FARM2ENSTA	30°21'52"S 51°15'57"W
DIADEMED TANAGER	M	BLUE.CEMAS-UFRGS 3.0 207	2020-01-21	2020-04-25	FARM2ENSTA	30°21'52"S 51°15'57"W
HOODED SISKIN	M	SILVER.CETAS.IBAMA 2.0 0168	2020-01-21	2020-04-25	FARM2ENSTA	30°21'52"S 51°15'57"W
HOODED SISKIN	M	SILVER.CETAS.IBAMA 2.0 01622	2020-01-21	2020-04-25	FARM2ENSTA	30°21'52"S 51°15'57"W
SHINY COWBIRD	M	RED.CETAS 2018 3.5 10346	2020-01-23	2020-04-25	FARM2ENSTA	30°21'52"S 51°15'57"W
COMMON WAXBILL	M	SILVER.CETAS.IBAMA 2.0 0054	2020-01-23	2020-04-25	FARM2ENSTA	30°21'52"S 51°15'57"W
COMMON WAXBILL	NI	SILVER.CETAS.IBAMA 2.0 0052	2020-01-21	2020-04-25	FARM2ENSTA	30°21'52"S 51°15'57"W
COMMON WAXBILL	NI	SILVER.CETAS.IBAMA 2.0 0189	2020-01-21	2020-04-25	FARM2ENSTA	30°21'52"S 51°15'57"W
GOLDEN-WINGED CACIQUE	NI	BLUE.CEMAS-UFRGS 3.0 195	2020-01-21	2020-04-25	FARM2ENSTA	30°21'52"S 51°15'57"W
RUBY-CROWNED TANAGER	M	BLUE.CEMAS-UFRGS 3.0 205	2020-01-21	2020-04-25	FARM2ENSTA	30°21'52"S 51°15'57"W
DIADEMED TANAGER	M	BLUE.CEMAS-UFRGS 3.0 208	2020-01-22	2020-04-25	FARM2ENSTA	30°21'52"S 51°15'57"W
RUSTY-COLLARED SEEDEATER	M	RED.CETAS 2018 2.6 12322	2020-01-23	2020-04-25	FARM2ENSTA	30°21'52"S 51°15'57"W
DOUBLE-COLLARED SEEDEATER	M	SILVER.CETAS.IBAMA 2.0 00175	2020-01-23	2020-04-25	FARM2ENSTA	30°21'52"S 51°15'57"W
DOUBLE-COLLARED SEEDEATER	M	SILVER.CETAS.IBAMA 2.0 0067	2020-01-21	2020-04-25	FARM2ENSTA	30°21'52"S 51°15'57"W
DOUBLE-COLLARED SEEDEATER	M	SILVER.CETAS.IBAMA 2.0 0066	2020-01-21	2020-04-25	FARM2ENSTA	30°21'52"S 51°15'57"W
DOUBLE-COLLARED SEEDEATER	M	SILVER.CETAS.IBAMA 2.0 0196	2020-01-21	2020-04-25	FARM2ENSTA	30°21'52"S 51°15'57"W
DOUBLE-COLLARED SEEDEATER	NI	SILVER.CETAS.IBAMA 2.0 0163	2020-01-21	2020-04-25	FARM2ENSTA	30°21'52"S 51°15'57"W
DOUBLE-COLLARED SEEDEATER	M	RED.CETAS 2018 2.5 01989	2020-01-22	2020-04-25	FARM2ENSTA	30°21'52"S 51°15'57"W
DOUBLE-COLLARED SEEDEATER	M	SILVER.CETAS.IBAMA 2.0 0162	2020-01-23	2020-04-25	FARM2ENSTA	30°21'52"S 51°15'57"W
DOUBLE-COLLARED SEEDEATER	M	SILVER.CETAS.IBAMA 2.0 0186	2020-01-23	2020-04-25	FARM2ENSTA	30°21'52"S 51°15'57"W
DOUBLE-COLLARED SEEDEATER	M	SILVER.IBAMA OA 2.2 322086	2020-01-21	2020-04-25	FARM2ENSTA	30°21'52"S 51°15'57"W
DOUBLE-COLLARED SEEDEATER	NI	SILVER.CETAS.IBAMA 2.0 0168	2020-01-21	2020-04-25	FARM2ENSTA	30°21'52"S 51°15'57"W
DOUBLE-COLLARED SEEDEATER	NI	SILVER.CETAS.IBAMA 2.0 069	2020-01-21	2020-04-25	FARM2ENSTA	30°21'52"S 51°15'57"W
DOUBLE-COLLARED SEEDEATER	NI	SILVER.CETAS.IBAMA 2.0 0164	2020-01-21	2020-04-25	FARM2ENSTA	30°21'52"S 51°15'57"W
DOUBLE-COLLARED SEEDEATER	M	SILVER.CETAS.IBAMA 2.0 065	2020-01-21	2020-04-25	FARM2ENSTA	30°21'52"S 51°15'57"W
CHESTNUT-BELLIED SEED-FINCH	M	RED.CETAS 2018 2.5 01960	2020-01-21	2020-04-25	FARM2ENSTA	30°21'52"S 51°15'57"W
CHESTNUT-BELLIED SEED-FINCH	M	RED.CETAS 2018 2.5 01905	2020-01-21	2020-04-25	FARM2ENSTA	30°21'52"S 51°15'57"W
RUFOUS-COLLARED SPARROW	M	PURPLE.CEMAS-UFRGS 2.5 084	2020-07-10	2020-08-11	CEMASUFRGS	30°04'27"S 51°07'35"W
BLUE-YELLOW TANAGER	M	RED.CETAS 2018 3.5 10721	2020-07-10	2020-08-11	CEMASUFRGS	30°04'27"S 51°07'35"W
DOUBLE-COLLARED SEEDEATER	M	RED.CETAS 2018 2.0 05452	2020-07-10	2020-08-11	CEMASUFRGS	30°04'27"S 51°07'35"W
DOUBLE-COLLARED SEEDEATER	NI	RED.CETAS 2018 2.0 05453	2020-07-10	2020-08-11	CEMASUFRGS	30°04'27"S 51°07'35"W
DOUBLE-COLLARED SEEDEATER	M	RED.CETAS 2018 2.0 05454	2020-07-10	2020-08-11	CEMASUFRGS	30°04'27"S 51°07'35"W
DOUBLE-COLLARED SEEDEATER	M	RED.CETAS 2018 2.0 05455	2020-07-10	2020-08-11	CEMASUFRGS	30°04'27"S 51°07'35"W
DOUBLE-COLLARED SEEDEATER	M	RED.CETAS 2018 2.0 05458	2020-07-10	2020-08-11	CEMASUFRGS	30°04'27"S 51°07'35"W
BLUE-YELLOW TANAGER	NI	SILVER.CETAS 2015 3.2 35000	2020-07-10	2020-08-11	CEMASUFRGS	30°04'27"S 51°07'35"W
BLUE-YELLOW TANAGER	NI	SILVER.CETAS 2015 3.2 34301	2020-07-10	2020-08-11	CEMASUFRGS	30°04'27"S 51°07'35"W
BLUE-YELLOW TANAGER	NI	SILVER.CETAS 2015 3.2 34999	2020-07-10	2020-08-11	CEMASUFRGS	30°04'27"S 51°07'35"W
RUBY-CROWNED TANAGER	M	RED.CETAS 2018 3.0 02612	2020-07-10	2020-08-11	CEMASUFRGS	30°04'27"S 51°07'35"W
RUFOUS-COLLARED SPARROW	M	GREEN.CEMAS-UFRGS 2.5 104	2020-07-10	2020-08-11	CEMASUFRGS	30°04'27"S 51°07'35"W
DIADEMED TANAGER	M	RED.CETAS 2018 2.6 11714	2020-07-13	2020-09-29	ROUNDGROVE	30°20'31"S 51°18'02"W
DIADEMED TANAGER	NI	SILVER.IBAMA 03-04 2.8 045907	2020-07-13	2020-09-29	ROUNDGROVE	30°20'31"S 51°18'02"W
BLACK-RUFOUS WARBLING FINCH	M	RED.CETAS 2018 2.6 08041	2020-07-13	2020-09-29	ROUNDGROVE	30°20'31"S 51°18'02"W
GRAY-THROATED WARBLING-FINCH	M	RED.CETAS 2018 2.5 01746	2020-07-13	2020-09-29	ROUNDGROVE	30°20'31"S 51°18'02"W
GOLDEN-WINGED CACIQUE	M	RED.CETAS 2018 3.0 02302	2020-07-13	2020-09-29	ROUNDGROVE	30°20'31"S 51°18'02"W
GOLDEN-WINGED CACIQUE	NI	RED.CETAS 2018 4.0 05131	2020-07-13	2020-09-29	ROUNDGROVE	30°20'31"S 51°18'02"W
DOUBLE-COLLARED SEEDEATER	M	RED.CETAS 2018 2.2 08328	2020-07-13	2020-09-29	ROUNDGROVE	30°20'31"S 51°18'02"W
DOUBLE-COLLARED SEEDEATER	M	SILVER.IBAMA OA 2.2 321866	2020-07-13	2020-09-29	ROUNDGROVE	30°20'31"S 51°18'02"W
DOUBLE-COLLARED SEEDEATER	M	RED.CETAS 2018 2.2 08147	2020-07-13	2020-09-29	ROUNDGROVE	30°20'31"S 51°18'02"W
DOUBLE-COLLARED SEEDEATER	NI	RED.CETAS 2018 2.2 08141	2020-07-13	2020-09-29	ROUNDGROVE	30°20'31"S 51°18'02"W
DOUBLE-COLLARED SEEDEATER	M	RED.CETAS 2018 2.2 08150	2020-07-13	2020-09-29	ROUNDGROVE	30°20'31"S 51°18'02"W
HOODED SISKIN	M	RED.CETAS 2018 2.4 08330	2020-07-13	2020-09-29	ROUNDGROVE	30°20'31"S 51°18'02"W
HOODED SISKIN	NI	RED.CETAS 2018 2.5 01747	2020-07-13	2020-09-29	ROUNDGROVE	30°20'31"S 51°18'02"W
HOODED SISKIN	M	RED.CETAS 2018 2.5 01749	2020-07-13	2020-09-29	ROUNDGROVE	30°20'31"S 51°18'02"W
HOODED SISKIN	NI	RED.CETAS 2018 2.5 01979	2020-07-13	2020-09-29	ROUNDGROVE	30°20'31"S 51°18'02"W
HOODED SISKIN	M	SILVER.IBAMA 2.4 084803	2020-07-13	2020-09-29	ROUNDGROVE	30°20'31"S 51°18'02"W
HOODED SISKIN	M	RED.CETAS 2018 2.4 08333	2020-07-13	2020-09-29	ROUNDGROVE	30°20'31"S 51°18'02"W
HOODED SISKIN	NI	RED.CETAS 2018 2.5 01750	2020-07-13	2020-09-29	ROUNDGROVE	30°20'31"S 51°18'02"W
HOODED SISKIN	M	RED.CETAS 2018 2.4 08332	2020-07-13	2020-09-29	ROUNDGROVE	30°20'31"S 51°18'02"W
DOUBLE-COLLARED SEEDEATER	M	RED.CETAS 2018 2.2 08142	2020-07-13	2020-09-29	ROUNDGROVE	30°20'31"S 51°18'02"W
DOUBLE-COLLARED SEEDEATER	M	RED.CETAS 2018 2.2 08146	2020-07-13	2020-09-29	ROUNDGROVE	30°20'31"S 51°18'02"W
DOUBLE-COLLARED SEEDEATER	M	SILVER.IBAMA OA 2.2 099215	2020-07-13	2020-09-29	ROUNDGROVE	30°20'31"S 51°18'02"W
DOUBLE-COLLARED SEEDEATER	M	RED.CETAS 2018 2.2 08138	2020-07-13	2020-09-29	ROUNDGROVE	30°20'31"S 51°18'02"W
DOUBLE-COLLARED SEEDEATER	NI	RED.CETAS 2018 2.2 08139	2020-07-13	2020-09-29	ROUNDGROVE	30°20'31"S 51°18'02"W
SHINY COWBIRD	NI	GREEN.CEMAS-UFRGS 3.5 694	2020-09-16	2020-11-27	FARM3CAPYDAM	30°24'59"S 51°15'35"W
SHINY COWBIRD	M	GREEN.CEMAS-UFRGS 3.5 693	2020-09-16	2020-11-27	FARM3CAPYDAM	30°24'59"S 51°15'35"W
RED-RUMPED CACIQUE	NI	RED.CETAS 2018 4.0 05138	2020-09-16	2020-11-27	FARM3CAPYDAM	30°24'59"S 51°15'35"W
RED-RUMPED CACIQUE	NI	RED.CETAS 2018 3.8 01526	2020-09-16	2020-11-27	FARM3CAPYDAM	30°24'59"S 51°15'35"W
GRASSLAND YELLOW FINCH	M	RED.CETAS 2018 2.0 05307	2020-09-16	2020-11-27	FARM3CAPYDAM	30°24'59"S 51°15'35"W
GRASSLAND YELLOW FINCH	M	RED.CETAS 2018 2.0 05306	2020-09-16	2020-11-27	FARM3CAPYDAM	30°24'59"S 51°15'35"W
CHESTNUT-BELLIED SEED-FINCH	NI	RED.CETAS 2018 2.5 02099	2020-09-16	2020-11-27	FARM3CAPYDAM	30°24'59"S 51°15'35"W
CHESTNUT-BELLIED SEED-FINCH	NI	RED.CETAS 2018 2.5 02098	2020-09-16	2020-11-27	FARM3CAPYDAM	30°24'59"S 51°15'35"W
CHESTNUT-BELLIED SEED-FINCH	M	RED.CETAS 2018 2.5 02097	2020-09-16	2020-11-27	FARM3CAPYDAM	30°24'59"S 51°15'35"W
CHESTNUT-BELLIED SEED-FINCH	NI	RED.CETAS 2018 2.5 02096	2020-09-16	2020-11-27	FARM3CAPYDAM	30°24'59"S 51°15'35"W
CHESTNUT-BELLIED SEED-FINCH	NI	RED.CETAS 2018 2.5 02095	2020-09-16	2020-11-27	FARM3CAPYDAM	30°24'59"S 51°15'35"W
CHESTNUT-BELLIED SEED-FINCH	NI	RED.CETAS 2018 2.5 02094	2020-09-16	2020-11-27	FARM3CAPYDAM	30°24'59"S 51°15'35"W
CHESTNUT-BELLIED SEED-FINCH	NI	RED.CETAS 2018 2.5 02093	2020-09-16	2020-11-27	FARM3CAPYDAM	30°24'59"S 51°15'35"W
CHESTNUT-BELLIED SEED-FINCH	NI	RED.CETAS 2018 2.5 02092	2020-09-16	2020-11-27	FARM3CAPYDAM	30°24'59"S 51°15'35"W
CHESTNUT-BELLIED SEED-FINCH	NI	RED.CETAS 2018 2.5 02091	2020-09-16	2020-11-27	FARM3CAPYDAM	30°24'59"S 51°15'35"W
CHESTNUT-BELLIED SEED-FINCH	NI	RED.CETAS 2018 2.5 02090	2020-09-16	2020-11-27	FARM3CAPYDAM	30°24'59"S 51°15'35"W
CHESTNUT-BELLIED SEED-FINCH	NI	RED.CETAS 2018 2.5 02089	2020-09-16	2020-11-27	FARM3CAPYDAM	30°24'59"S 51°15'35"W
CHESTNUT-BELLIED SEED-FINCH	NI	RED.CETAS 2018 2.5 02088	2020-09-16	2020-11-27	FARM3CAPYDAM	30°24'59"S 51°15'35"W
CHESTNUT-BELLIED SEED-FINCH	NI	RED.CETAS 2018 2.5 02087	2020-09-16	2020-11-27	FARM3CAPYDAM	30°24'59"S 51°15'35"W
CHESTNUT-BELLIED SEED-FINCH	M	RED.CETAS 2018 2.5 02086	2020-09-16	2020-11-27	FARM3CAPYDAM	30°24'59"S 51°15'35"W
CHESTNUT-BELLIED SEED-FINCH	NI	RED.CETAS 2018 2.5 02085	2020-09-16	2020-11-27	FARM3CAPYDAM	30°24'59"S 51°15'35"W
CHESTNUT-BELLIED SEED-FINCH	NI	RED.CETAS 2018 2.5 02084	2020-09-16	2020-11-27	FARM3CAPYDAM	30°24'59"S 51°15'35"W
CHESTNUT-BELLIED SEED-FINCH	M	SILVER.SISPASS RSA 2.6 002568	2020-09-16	2020-11-27	FARM3CAPYDAM	30°24'59"S 51°15'35"W
CHESTNUT-BELLIED SEED-FINCH	NI	SILVER.SISPASS RSA 2.6 003578	2020-09-16	2020-11-27	FARM3CAPYDAM	30°24'59"S 51°15'35"W
CHESTNUT-BELLIED SEED-FINCH	M	SILVER.SISPASS RSA 2.6 007642	2020-09-16	2020-11-27	FARM3CAPYDAM	30°24'59"S 51°15'35"W
GLAUCUS-BLUE GROSBEAK	M	RED.CETAS 2018 2.5 02061	2020-09-15	2020-12-01	FARM3PADD2	30°22'36"S 51°15'32"W
RUFOUS-COLLARED SPARROW	M	RED.CETAS 2018 2.5 01969	2020-09-15	2020-12-01	FARM3PADD2	30°22'36"S 51°15'32"W
HOODED SISKIN	M	RED.CETAS 2018 2.4 08691	2020-09-15	2020-12-01	FARM3PADD2	30°22'36"S 51°15'32"W
HOODED SISKIN	M	RED.CETAS 2018 2.4 08577	2020-09-15	2020-12-01	FARM3PADD2	30°22'36"S 51°15'32"W
HOODED SISKIN	M	RED.CETAS 2018 2.4 08574	2020-09-15	2020-12-01	FARM3PADD2	30°22'36"S 51°15'32"W
HOODED SISKIN	M	RED.CETAS 2018 2.4 08576	2020-09-15	2020-12-01	FARM3PADD2	30°22'36"S 51°15'32"W
CHESTNUT-BELLIED SEED-FINCH	M	RED.CETAS 2018 2.6 002537	2020-09-15	2020-12-01	FARM3PADD2	30°22'36"S 51°15'32"W
CHESTNUT-BELLIED SEED-FINCH	M	SILVER.SISPASS SPA 2.6 003522	2020-09-15	2020-12-01	FARM3PADD2	30°22'36"S 51°15'32"W
CHESTNUT-BELLIED SEED-FINCH	NI	RED.CETAS 2018 2.2 07851	2020-09-15	2020-12-01	FARM3PADD2	30°22'36"S 51°15'32"W
CHESTNUT-BELLIED SEED-FINCH	M	RED.CETAS 2018 2.2 08752	2020-09-15	2020-12-01	FARM3PADD2	30°22'36"S 51°15'32"W
CHESTNUT-BELLIED SEED-FINCH	M	SILVER.SISPASS RSA 2.6 005835	2020-09-15	2020-12-01	FARM3PADD2	30°22'36"S 51°15'32"W
DIADEMED TANAGER	M	RED.CETAS 2018 3.2 05067	2020-09-15	2020-12-01	FARM3PADD2	30°22'36"S 51°15'32"W
DIADEMED TANAGER	M	BLUE.CEMAS-UFRGS 3.0 191	2020-09-15	2020-12-01	FARM3PADD2	30°22'36"S 51°15'32"W
DOUBLE-COLLARED SEEDEATER	M	RED.CETAS 2018 2.0 05665	2020-09-15	2020-12-01	FARM3PADD2	30°22'36"S 51°15'32"W
DOUBLE-COLLARED SEEDEATER	M	RED.CETAS 2018 2.2 07872	2020-09-15	2020-12-01	FARM3PADD2	30°22'36"S 51°15'32"W
DOUBLE-COLLARED SEEDEATER	M	RED.CETAS 2018 2.2 08339	2020-09-15	2020-12-01	FARM3PADD2	30°22'36"S 51°15'32"W
DOUBLE-COLLARED SEEDEATER	NI	RED.CETAS 2018 2.2 08338	2020-09-15	2020-12-01	FARM3PADD2	30°22'36"S 51°15'32"W
DOUBLE-COLLARED SEEDEATER	M	RED.CETAS 2018 2.0 05661	2020-09-15	2020-12-01	FARM3PADD2	30°22'36"S 51°15'32"W
DOUBLE-COLLARED SEEDEATER	M	RED.CETAS 2018 2.2 07875	2020-09-15	2020-12-01	FARM3PADD2	30°22'36"S 51°15'32"W
DOUBLE-COLLARED SEEDEATER	M	RED.CETAS 2018 2.2 07874	2020-09-15	2020-12-01	FARM3PADD2	30°22'36"S 51°15'32"W
DOUBLE-COLLARED SEEDEATER	M	RED.CETAS 2018 2.0 05582	2020-09-15	2020-12-01	FARM3PADD2	30°22'36"S 51°15'32"W
RUFOUS-COLLARED SPARROW	M	RED.CETAS 2018 2.8 08687	2020-09-15	2020-12-01	FARM3PADD2	30°22'36"S 51°15'32"W
RUFOUS-COLLARED SPARROW	M	RED.CETAS 2018 2.8 08689	2020-09-15	2020-12-01	FARM3PADD2	30°22'36"S 51°15'32"W
RUFOUS-COLLARED SPARROW	M	BLUE.CEMAS-UFRGS 3.0 220	2020-09-15	2020-12-01	FARM3PADD2	30°22'36"S 51°15'32"W
RUBY-CROWNED TANAGER	M	RED.CETAS 2018 2.8 08355	2020-09-15	2020-12-01	FARM3PADD2	30°22'36"S 51°15'32"W
RUBY-CROWNED TANAGER	M	RED.CETAS 2018 3.0 02450	2020-09-15	2020-12-01	FARM3PADD2	30°22'36"S 51°15'32"W
DOUBLE-COLLARED SEEDEATER	M	RED.CETAS 2018 2.2 08130	2020-09-15	2020-12-01	FARM3PADD2	30°22'36"S 51°15'32"W
DOUBLE-COLLARED SEEDEATER	M	RED.CETAS 2018 2.0 05309	2020-09-15	2020-12-01	FARM3PADD2	30°22'36"S 51°15'32"W
DOUBLE-COLLARED SEEDEATER	M	RED.CETAS 2018 2.0 05321	2020-09-15	2020-12-01	FARM3PADD2	30°22'36"S 51°15'32"W
DOUBLE-COLLARED SEEDEATER	M	RED.CETAS 2018 2.2 08149	2020-09-15	2020-12-01	FARM3PADD2	30°22'36"S 51°15'32"W
DOUBLE-COLLARED SEEDEATER	M	RED.CETAS 2018 2.2 08145	2020-09-15	2020-12-01	FARM3PADD2	30°22'36"S 51°15'32"W
RUFOUS-COLLARED SPARROW	M	RED.CETAS 2018 2.8 12642	2020-09-15	2020-12-01	FARM3PADD2	30°22'36"S 51°15'32"W
RUFOUS-COLLARED SPARROW	M	SILVER.CETAS.IBAMA 2.8 0741	2020-09-15	2020-12-01	FARM3PADD2	30°22'36"S 51°15'32"W
RUFOUS-COLLARED SPARROW	M	RED.CETAS 2018 2.8 08485	2020-09-15	2020-12-01	FARM3PADD2	30°22'36"S 51°15'32"W
DOUBLE-COLLARED SEEDEATER	NI	RED.CETAS 2018 2.2 07862	2020-09-15	2020-12-01	FARM3PADD2	30°22'36"S 51°15'32"W
RUFOUS-COLLARED SPARROW	M	SILVER.SISPASS RSA 2.8 015208	2020-09-15	2020-12-01	FARM3PADD2	30°22'36"S 51°15'32"W
GOLDEN-WINGED CACIQUE	NI	SILVER.SISPASS 4.0 RSA 001553	2020-09-15	2020-12-01	FARM3PADD2	30°22'36"S 51°15'32"W
CREAMY-BELLIED THRUSH	NI	RED.CETAS 2018 4.0 04865	2020-12-10	2021-02-27	FARM2BRIDGE	30°21'51"S 51°16'00"W
CREAMY-BELLIED THRUSH	NI	RED.CETAS 2018 4.0 05162	2020-12-10	2021-02-27	FARM2BRIDGE	30°21'51"S 51°16'00"W
DOUBLE-COLLARED SEEDEATER	M	RED.CETAS 2018 2.2 08102	2020-12-10	2021-02-27	FARM2BRIDGE	30°21'51"S 51°16'00"W
DOUBLE-COLLARED SEEDEATER	NI	RED.CETAS 2018 2.2 07895	2020-12-10	2021-02-27	FARM2BRIDGE	30°21'51"S 51°16'00"W
DOUBLE-COLLARED SEEDEATER	M	RED.CETAS 2018 2.2 08152	2020-12-10	2021-02-27	FARM2BRIDGE	30°21'51"S 51°16'00"W
DOUBLE-COLLARED SEEDEATER	NI	RED.CETAS 2018 2.2 08196	2020-12-10	2021-02-27	FARM2BRIDGE	30°21'51"S 51°16'00"W
DOUBLE-COLLARED SEEDEATER	M	RED.CETAS 2018 2.2 07896	2020-12-10	2021-02-27	FARM2BRIDGE	30°21'51"S 51°16'00"W
DOUBLE-COLLARED SEEDEATER	NI	RED.CETAS 2018 2.2 08151	2020-12-10	2021-02-27	FARM2BRIDGE	30°21'51"S 51°16'00"W
DOUBLE-COLLARED SEEDEATER	M	RED.CETAS 2018 2.2 08153	2020-12-10	2021-02-27	FARM2BRIDGE	30°21'51"S 51°16'00"W
DOUBLE-COLLARED SEEDEATER	M	RED.CETAS 2018 2.2 08197	2020-12-10	2021-02-27	FARM2BRIDGE	30°21'51"S 51°16'00"W
DOUBLE-COLLARED SEEDEATER	M	SILVER.IBAMA OA 2.2 245518	2020-12-10	2021-02-27	FARM2BRIDGE	30°21'51"S 51°16'00"W
DOUBLE-COLLARED SEEDEATER	M	SILVER.IBAMA 02-03 SC 2.2 1354	2020-12-10	2021-02-27	FARM2BRIDGE	30°21'51"S 51°16'00"W
SHINY COWBIRD	M	SILVER.CETAS 2018 4.5 03423	2020-12-10	2021-02-27	FARM2BRIDGE	30°21'51"S 51°16'00"W
CHESTNUT-BELLIED SEED-FINCH	M	SILVER.SISPASS RSA 2.6 001394	2020-12-10	2021-02-27	FARM2BRIDGE	30°21'51"S 51°16'00"W
CHESTNUT-BELLIED SEED-FINCH	M	SILVER.SISPASS SCA 2.6 006947	2020-12-10	2021-02-27	FARM2BRIDGE	30°21'51"S 51°16'00"W
COCOA THRUSH	NI	SILVER.CETAS 2018 4.0 04869	2020-12-10	2021-02-27	FARM2BRIDGE	30°21'51"S 51°16'00"W
CREAMY-BELLIED THRUSH	NI	SILVER.CETAS 2018 4.5 03422	2020-12-10	2021-02-27	FARM2BRIDGE	30°21'51"S 51°16'00"W
HOODED SISKIN	M	SILVER.IBAMA 03-04 2.4 01306	2020-12-10	2021-02-27	FARM2BRIDGE	30°21'51"S 51°16'00"W
GRASSLAND YELLOW FINCH	NI	RED.CETAS 2018 2.4 12238	2020-12-10	2021-02-27	FARM2BRIDGE	30°21'51"S 51°16'00"W
DOUBLE-COLLARED SEEDEATER	M	SILVER.IBAMA 03-04 2.2 016989	2020-12-10	2021-02-27	FARM2BRIDGE	30°21'51"S 51°16'00"W
DOUBLE-COLLARED SEEDEATER	M	SILVER.SISPASS RSA 2.2 004060	2020-12-10	2021-02-27	FARM2BRIDGE	30°21'51"S 51°16'00"W
HOODED SISKIN	NI	RED.CETAS 2018 2.4 08617	2020-12-10	2021-02-27	FARM2BRIDGE	30°21'51"S 51°16'00"W
BLUE-YELLOW TANAGER	M	RED.CETAS 2018 3.2 05077	2020-12-10	2021-02-27	FARM2BRIDGE	30°21'51"S 51°16'00"W
GOLDEN-WINGED CACIQUE	NI	SILVER.IBAMA OA 4.0 065720	2020-12-10	2021-02-27	FARM2BRIDGE	30°21'51"S 51°16'00"W
CHOPI BLACKBIRD	NI	SILVER.CETAS 2018 4.5 03415	2020-12-10	2021-02-27	FARM2BRIDGE	30°21'51"S 51°16'00"W
GLAUCUS-BLUE GROSBEAK	M	RED.CETAS 2018 2.4 08328	2020-12-10	2021-03-07	FARM3PADD2	30°22'36"S 51°15'32"W
GLAUCUS-BLUE GROSBEAK	M	RED.CETAS 2018 2.5 02067	2020-12-10	2021-03-07	FARM3PADD2	30°22'36"S 51°15'32"W
RUFOUS-COLLARED SPARROW	M	RED.CETAS 2018 2.5 02071	2020-12-10	2021-03-07	FARM3PADD2	30°22'36"S 51°15'32"W
GOLDEN-RUMPED EUPHONIA	NI	SILVER.CETAS.IBAMA 2.0 0072	2020-12-10	2021-03-07	FARM3PADD2	30°22'36"S 51°15'32"W
GOLDEN-RUMPED EUPHONIA	M	SILVER.CETAS.IBAMA 2.0 0073	2020-12-10	2021-03-07	FARM3PADD2	30°22'36"S 51°15'32"W
GOLDEN-RUMPED EUPHONIA	M	SILVER.CETAS.IBAMA 2.0 0074	2020-12-10	2021-03-07	FARM3PADD2	30°22'36"S 51°15'32"W
GOLDEN-RUMPED EUPHONIA	M	SILVER.CETAS.IBAMA 2.0 0075	2020-12-10	2021-03-07	FARM3PADD2	30°22'36"S 51°15'32"W
HOODED SISKIN	M	RED.CETAS 2018 2.0 05308	2020-12-10	2021-03-07	FARM3PADD2	30°22'36"S 51°15'32"W
HOODED SISKIN	NI	RED.CETAS 2018 2.0 05311	2020-12-10	2021-03-07	FARM3PADD2	30°22'36"S 51°15'32"W
HOODED SISKIN	NI	RED.CETAS 2018 2.0 05310	2020-12-10	2021-03-07	FARM3PADD2	30°22'36"S 51°15'32"W
HOODED SISKIN	NI	RED.CETAS 2018 2.0 05313	2020-12-10	2021-03-07	FARM3PADD2	30°22'36"S 51°15'32"W
HOODED SISKIN	M	RED.CETAS 2018 2.0 05312	2020-12-10	2021-03-07	FARM3PADD2	30°22'36"S 51°15'32"W
SWALLOW TANAGER	M	RED.CETAS 2018 2.8 08692	2020-12-10	2021-03-07	FARM3PADD2	30°22'36"S 51°15'32"W
SWALLOW TANAGER	M	RED.CETAS 2018 2.8 08693	2020-12-10	2021-03-07	FARM3PADD2	30°22'36"S 51°15'32"W
SWALLOW TANAGER	M	RED.CETAS 2018 2.8 08694	2020-12-10	2021-03-07	FARM3PADD2	30°22'36"S 51°15'32"W
SWALLOW TANAGER	NI	RED.CETAS 2018 2.8 08695	2020-12-10	2021-03-07	FARM3PADD2	30°22'36"S 51°15'32"W
CHESTNUT-BACKED TANAGER	M	RED.CETAS 2018 2.5 02074	2020-12-10	2021-03-07	FARM3PADD2	30°22'36"S 51°15'32"W
HOODED SISKIN	NI	RED.CETAS 2018 2.0 03906	2021-12-19	2022-04-12	FARM3PADD2	30°22'36"S 51°15'32"W
HOODED SISKIN	M	RED.CETAS 2018 2.0 08451	2021-12-19	2022-04-12	FARM3PADD2	30°22'36"S 51°15'32"W
HOODED SISKIN	M	RED.CETAS 2018 2.0 08452	2021-12-19	2022-04-12	FARM3PADD2	30°22'36"S 51°15'32"W
HOODED SISKIN	M	RED.CETAS 2018 2.0 08453	2021-12-19	2022-04-12	FARM3PADD2	30°22'36"S 51°15'32"W
HOODED SISKIN	NI	RED.CETAS 2018 2.0 05956	2021-12-19	2022-04-12	FARM3PADD2	30°22'36"S 51°15'32"W
HOODED SISKIN	NI	RED.CETAS 2018 2.0 03906	2021-12-19	2022-04-12	FARM3PADD2	30°22'36"S 51°15'32"W
HOODED SISKIN	M	RED.CETAS 2018 2.0 03922	2021-12-19	2022-04-12	FARM3PADD2	30°22'36"S 51°15'32"W
HOODED SISKIN	M	SILVER.SISPASS RSA 2.4 003406	2021-12-19	2022-04-12	FARM3PADD2	30°22'36"S 51°15'32"W
HOODED SISKIN	M	RED.CETAS 2018 2.2 08452	2021-12-19	2022-04-12	FARM3PADD2	30°22'36"S 51°15'32"W
HOODED SISKIN	M	RED.CETAS 2018 2.4 12874	2021-12-19	2022-04-12	FARM3PADD2	30°22'36"S 51°15'32"W
HOODED SISKIN	M	RED.CETAS 2018 2.4 12167	2021-12-19	2022-04-12	FARM3PADD2	30°22'36"S 51°15'32"W
HOODED SISKIN	NI	RED.CETAS 2018 2.4 12168	2021-12-19	2022-04-12	FARM3PADD2	30°22'36"S 51°15'32"W
HOODED SISKIN	M	RED.CETAS 2018 2.4 12169	2021-12-19	2022-04-12	FARM3PADD2	30°22'36"S 51°15'32"W
HOODED SISKIN	M	RED.CETAS 2018 2.4 08301	2021-12-19	2022-04-12	FARM3PADD2	30°22'36"S 51°15'32"W
RUFOUS-COLLARED SPARROW	NI	RED.CETAS 2018 2.8 12250	2021-12-17	2022-04-17	FARM3PADD3	30°23'25"S 51°16'50"W
RUFOUS-COLLARED SPARROW	NI	RED.CETAS 2018 2.8 13070	2021-12-17	2022-04-17	FARM3PADD3	30°23'25"S 51°16'50"W
RUFOUS-COLLARED SPARROW	NI	SILVER.CETAS.IBAMA 2.6 2261	2021-12-17	2022-04-17	FARM3PADD3	30°23'25"S 51°16'50"W
RUFOUS-COLLARED SPARROW	NI	SILVER.CETAS.IBAMA 2.6 0852	2021-12-17	2022-04-17	FARM3PADD3	30°23'25"S 51°16'50"W
COMMON WAXBILL	NI	RED.CETAS 2018 2.0 03918	2021-12-17	2022-04-17	FARM3PADD3	30°23'25"S 51°16'50"W
GRASSLAND YELLOW FINCH	M	RED.CETAS 2018 2.4 12857	2021-12-17	2022-04-17	FARM3PADD3	30°23'25"S 51°16'50"W
PEARLY-BELLIED SEEDEATER	NI	RED.CETAS 2018 2.4 13044	2021-12-17	2022-04-17	FARM3PADD3	30°23'25"S 51°16'50"W
SWALLOW-TAILED MANAKIN	M	RED.CETAS 2018 2.6 12419	2021-12-17	2022-04-17	FARM3PADD3	30°23'25"S 51°16'50"W
GLAUCUS-BLUE GROSBEAK	M	RED.CETAS 2018 2.6 02257	2021-12-17	2022-04-17	FARM3PADD3	30°23'25"S 51°16'50"W
GLAUCUS-BLUE GROSBEAK	M	SILVER.IBAMA 05-06 2.6 247793	2021-12-17	2022-04-17	FARM3PADD3	30°23'25"S 51°16'50"W
DOUBLE-COLLARED SEEDEATER	M	RED.CETAS 2018 2.2 03925	2021-12-17	2022-04-17	FARM3PADD3	30°23'25"S 51°16'50"W
DOUBLE-COLLARED SEEDEATER	M	RED.CETAS 2018 2.0 03901	2021-12-17	2022-04-17	FARM3PADD3	30°23'25"S 51°16'50"W
DOUBLE-COLLARED SEEDEATER	M	RED.CETAS 2018 2.4 12116	2021-12-17	2022-04-17	FARM3PADD3	30°23'25"S 51°16'50"W
DOUBLE-COLLARED SEEDEATER	M	RED.CETAS 2018 2.0 03912	2021-12-17	2022-04-17	FARM3PADD3	30°23'25"S 51°16'50"W
DOUBLE-COLLARED SEEDEATER	M	RED.CETAS 2018 2.0 03913	2021-12-17	2022-04-17	FARM3PADD3	30°23'25"S 51°16'50"W
DOUBLE-COLLARED SEEDEATER	M	RED.CETAS 2018 2.0 03914	2021-12-17	2022-04-17	FARM3PADD3	30°23'25"S 51°16'50"W
DOUBLE-COLLARED SEEDEATER	M	RED.CETAS 2018 2.0 05698	2021-12-17	2022-04-17	FARM3PADD3	30°23'25"S 51°16'50"W
DOUBLE-COLLARED SEEDEATER	NI	RED.CETAS 2018 2.0 05341	2021-12-17	2022-04-17	FARM3PADD3	30°23'25"S 51°16'50"W
DOUBLE-COLLARED SEEDEATER	NI	RED.CETAS 2018 2.0 03916	2021-12-17	2022-04-17	FARM3PADD3	30°23'25"S 51°16'50"W
DOUBLE-COLLARED SEEDEATER	NI	RED.CETAS 2018 2.0 03917	2021-12-17	2022-04-17	FARM3PADD3	30°23'25"S 51°16'50"W
DOUBLE-COLLARED SEEDEATER	NI	RED.CETAS 2018 2.0 03919	2021-12-17	2022-04-17	FARM3PADD3	30°23'25"S 51°16'50"W
DOUBLE-COLLARED SEEDEATER	M	RED.CETAS 2018 2.0 03920	2021-12-17	2022-04-17	FARM3PADD3	30°23'25"S 51°16'50"W
DOUBLE-COLLARED SEEDEATER	M	SILVER.IBAMA OA 2.2 2865663	2021-12-17	2022-04-17	FARM3PADD3	30°23'25"S 51°16'50"W
DOUBLE-COLLARED SEEDEATER	M	SILVER.SISPASS RSA 2.2 003838	2021-12-17	2022-04-17	FARM3PADD3	30°23'25"S 51°16'50"W
DOUBLE-COLLARED SEEDEATER	M	SILVER.IBAMA OA 2.2 285832	2021-12-17	2022-04-17	FARM3PADD3	30°23'25"S 51°16'50"W
DOUBLE-COLLARED SEEDEATER	NI	SILVER.IBAMA OA 2.2 250891	2021-12-17	2022-04-17	FARM3PADD3	30°23'25"S 51°16'50"W
DOUBLE-COLLARED SEEDEATER	M	SILVER.IBAMA OA 2.2 141959	2021-12-17	2022-04-17	FARM3PADD3	30°23'25"S 51°16'50"W
DOUBLE-COLLARED SEEDEATER	M	SILVER.IBAMA 05-06 2.2 089312	2021-12-17	2022-04-17	FARM3PADD3	30°23'25"S 51°16'50"W
DOUBLE-COLLARED SEEDEATER	NI	SILVER.IBAMA OA 2.2 246044	2021-12-17	2022-04-17	FARM3PADD3	30°23'25"S 51°16'50"W
DOUBLE-COLLARED SEEDEATER	M	SILVER.IBAMA OA 2.2 099400	2022-01-04	2022-04-24	FARM2ENSTA	30°21'52"S 51°15'57"W
DOUBLE-COLLARED SEEDEATER	NI	SILVER.SISPASS RSA 2.2 006164	2022-01-04	2022-04-24	FARM2ENSTA	30°21'52"S 51°15'57"W
DOUBLE-COLLARED SEEDEATER	NI	SILVER.IBAMA 05-06 2.2 071321	2022-01-04	2022-04-24	FARM2ENSTA	30°21'52"S 51°15'57"W
DOUBLE-COLLARED SEEDEATER	M	RED.CETAS 2018 2.0 10957	2022-01-04	2022-04-24	FARM2ENSTA	30°21'52"S 51°15'57"W
DOUBLE-COLLARED SEEDEATER	M	SILVER.IBAMA 04-05 2.2 057538	2022-01-04	2022-04-24	FARM2ENSTA	30°21'52"S 51°15'57"W
DOUBLE-COLLARED SEEDEATER	M	SILVER.SISPASS RSA 2.2 001339	2022-01-04	2022-04-24	FARM2ENSTA	30°21'52"S 51°15'57"W
DOUBLE-COLLARED SEEDEATER	M	SILVER.IBAMA OA 2.2 18657	2022-01-04	2022-04-24	FARM2ENSTA	30°21'52"S 51°15'57"W
DOUBLE-COLLARED SEEDEATER	M	RED.CETAS 2018 2.0 03926	2022-01-04	2022-04-24	FARM2ENSTA	30°21'52"S 51°15'57"W
DOUBLE-COLLARED SEEDEATER	M	RED.CETAS 2018 2.0 03927	2022-01-04	2022-04-24	FARM2ENSTA	30°21'52"S 51°15'57"W
DOUBLE-COLLARED SEEDEATER	NI	RED.CETAS 2018 2.0 03928	2022-01-04	2022-04-24	FARM2ENSTA	30°21'52"S 51°15'57"W
DOUBLE-COLLARED SEEDEATER	M	RED.CETAS 2018 2.4 12421	2022-01-04	2022-04-24	FARM2ENSTA	30°21'52"S 51°15'57"W
DOUBLE-COLLARED SEEDEATER	M	RED.CETAS 2018 2.0 03929	2022-01-04	2022-04-24	FARM2ENSTA	30°21'52"S 51°15'57"W
DOUBLE-COLLARED SEEDEATER	M	RED.CETAS 2018 2.4 12428	2022-01-04	2022-04-24	FARM2ENSTA	30°21'52"S 51°15'57"W
DOUBLE-COLLARED SEEDEATER	M	RED.CETAS 2018 2.4 08324	2022-01-04	2022-04-24	FARM2ENSTA	30°21'52"S 51°15'57"W
DOUBLE-COLLARED SEEDEATER	M	RED.CETAS 2018 2.4 12871	2022-01-08	2022-04-24	FARM2ENSTA	30°21'52"S 51°15'57"W
DOUBLE-COLLARED SEEDEATER	M	RED.CETAS 2018 2.4 12872	2022-01-08	2022-04-24	FARM2ENSTA	30°21'52"S 51°15'57"W
DOUBLE-COLLARED SEEDEATER	M	RED.CETAS 2018 2.4 12873	2022-01-08	2022-04-24	FARM2ENSTA	30°21'52"S 51°15'57"W
DOUBLE-COLLARED SEEDEATER	M	RED.CETAS 2018 2.4 12874	2022-01-08	2022-04-24	FARM2ENSTA	30°21'52"S 51°15'57"W
DOUBLE-COLLARED SEEDEATER	M	SILVER.IBAMA 03-04 2.6 019504	2022-01-08	2022-04-24	FARM2ENSTA	30°21'52"S 51°15'57"W
DOUBLE-COLLARED SEEDEATER	NI	RED.CETAS 2018 2.4 12119	2022-01-08	2022-04-24	FARM2ENSTA	30°21'52"S 51°15'57"W
DOUBLE-COLLARED SEEDEATER	M	RED.CETAS 2018 2.4 12115	2022-01-08	2022-04-24	FARM2ENSTA	30°21'52"S 51°15'57"W
DOUBLE-COLLARED SEEDEATER	M	RED.CETAS 2018 2.4 12112	2022-01-08	2022-04-24	FARM2ENSTA	30°21'52"S 51°15'57"W
DOUBLE-COLLARED SEEDEATER	M	RED.CETAS 2018 2.4 12125	2022-01-08	2022-04-24	FARM2ENSTA	30°21'52"S 51°15'57"W
DOUBLE-COLLARED SEEDEATER	NI	RED.CETAS 2018 2.0 0341	2022-01-08	2022-04-24	FARM2ENSTA	30°21'52"S 51°15'57"W
DOUBLE-COLLARED SEEDEATER	M	RED.CETAS 2018 2.2 07889	2022-01-08	2022-04-24	FARM2ENSTA	30°21'52"S 51°15'57"W
DOUBLE-COLLARED SEEDEATER	M	RED.CETAS 2018 2.4 12129	2022-01-08	2022-04-24	FARM2ENSTA	30°21'52"S 51°15'57"W
DOUBLE-COLLARED SEEDEATER	NI	RED.CETAS 2018 2.4 13046	2022-01-08	2022-04-24	FARM2ENSTA	30°21'52"S 51°15'57"W
DOUBLE-COLLARED SEEDEATER	NI	RED.CETAS 2018 2.4 12161	2022-01-08	2022-04-24	FARM2ENSTA	30°21'52"S 51°15'57"W
DOUBLE-COLLARED SEEDEATER	NI	RED.CETAS 2018 2.4 12162	2022-01-08	2022-04-24	FARM2ENSTA	30°21'52"S 51°15'57"W
DOUBLE-COLLARED SEEDEATER	NI	RED.CETAS 2018 2.4 12163	2022-01-08	2022-04-24	FARM2ENSTA	30°21'52"S 51°15'57"W
DOUBLE-COLLARED SEEDEATER	NI	RED.CETAS 2018 2.4 12134	2022-01-08	2022-04-24	FARM2ENSTA	30°21'52"S 51°15'57"W
DOUBLE-COLLARED SEEDEATER	NI	RED.CETAS 2018 2.2 68820	2022-01-08	2022-04-24	FARM2ENSTA	30°21'52"S 51°15'57"W
DOUBLE-COLLARED SEEDEATER	NI	RED.CETAS 2018 2.2 68821	2022-01-08	2022-04-24	FARM2ENSTA	30°21'52"S 51°15'57"W
DOUBLE-COLLARED SEEDEATER	NI	SILVER.IBAMA OA 2.2 099290	2022-01-08	2022-04-24	FARM2ENSTA	30°21'52"S 51°15'57"W
DOUBLE-COLLARED SEEDEATER	NI	RED.CETAS 2018 2.4 12166	2022-01-08	2022-04-24	FARM2ENSTA	30°21'52"S 51°15'57"W
DIADEMED TANAGER	NI	SILVER.IBAMA OA 2.8 584976	2022-01-04	2022-05-17	FARM2BRIDGE	30°21'51"S 51°16'00"W
DIADEMED TANAGER	NI	SILVER.CETAS.IBAMA 2015 33243	2022-01-04	2022-05-17	FARM2BRIDGE	30°21'51"S 51°16'00"W
DIADEMED TANAGER	NI	SILVER.CETAS.IBAMA 2015 34241	2022-01-04	2022-05-17	FARM2BRIDGE	30°21'51"S 51°16'00"W
DIADEMED TANAGER	NI	SILVER.CETAS.IBAMA 2015 34237	2022-01-04	2022-05-17	FARM2BRIDGE	30°21'51"S 51°16'00"W
DIADEMED TANAGER	NI	SILVER.CETAS.IBAMA 2015 34252	2022-01-04	2022-05-17	FARM2BRIDGE	30°21'51"S 51°16'00"W
DIADEMED TANAGER	NI	GOLDEN.CEMAS 3.0 244	2022-01-04	2022-05-17	FARM2BRIDGE	30°21'51"S 51°16'00"W
DIADEMED TANAGER	NI	RED.CETAS 2018 3.5 06690	2022-01-04	2022-05-17	FARM2BRIDGE	30°21'51"S 51°16'00"W
DIADEMED TANAGER	NI	RED.CETAS 2018 4.0 05059	2022-01-04	2022-05-17	FARM2BRIDGE	30°21'51"S 51°16'00"W
DIADEMED TANAGER	NI	SILVER.CETAS.IBAMA 2.8 0862	2022-01-04	2022-05-17	FARM2BRIDGE	30°21'51"S 51°16'00"W
DIADEMED TANAGER	NI	RED.CETAS 2018 2.8 13058	2022-01-08	2022-05-17	FARM2BRIDGE	30°21'51"S 51°16'00"W
DIADEMED TANAGER	NI	SILVER.CETAS.IBAMA 3.5 2338	2022-01-08	2022-05-17	FARM2BRIDGE	30°21'51"S 51°16'00"W
DIADEMED TANAGER	NI	SILVER.CETAS.IBAMA 2015 2335	2022-01-08	2022-05-17	FARM2BRIDGE	30°21'51"S 51°16'00"W
DIADEMED TANAGER	M	RED.CETAS 2018 2.8 13059	2022-01-08	2022-05-17	FARM2BRIDGE	30°21'51"S 51°16'00"W
DIADEMED TANAGER	NI	RED.CETAS 2018 2.8 13060	2022-01-08	2022-05-17	FARM2BRIDGE	30°21'51"S 51°16'00"W
DIADEMED TANAGER	M	RED.CETAS 2018 2.8 13061	2022-01-08	2022-05-17	FARM2BRIDGE	30°21'51"S 51°16'00"W
DIADEMED TANAGER	NI	RED.CETAS 2018 2.8 13062	2022-01-08	2022-05-17	FARM2BRIDGE	30°21'51"S 51°16'00"W
DIADEMED TANAGER	NI	SILVER CETAS 2015 3.5 2337	2022-01-08	2022-05-17	FARM2BRIDGE	30°21'51"S 51°16'00"W
DIADEMED TANAGER	NI	RED.CETAS 2018 2.8 13063	2022-01-08	2022-05-17	FARM2BRIDGE	30°21'51"S 51°16'00"W
DIADEMED TANAGER	NI	RED.CETAS 2018 2.8 13064	2022-01-08	2022-05-17	FARM2BRIDGE	30°21'51"S 51°16'00"W
RUSTY-COLLARED SEEDEATER	M	RED.CETAS 2018 2.4 12655	2022-04-14	2022-07-20	FARM2SEEDNUR	30°20'26"S 51°14'56"W
RUSTY-COLLARED SEEDEATER	M	RED.CETAS 2018 2.4 12418	2022-04-14	2022-07-20	FARM2SEEDNUR	30°20'26"S 51°14'56"W
RUSTY-COLLARED SEEDEATER	M	RED.CETAS 2018 2.4 12164	2022-04-14	2022-07-20	FARM2SEEDNUR	30°20'26"S 51°14'56"W
CHESTNUT-BELLIED SEED-FINCH	M	RED.CETAS 2018 2.4 12111	2022-04-14	2022-07-20	FARM2SEEDNUR	30°20'26"S 51°14'56"W
CHESTNUT-BELLIED SEED-FINCH	NI	RED.CETAS 2018 2.4 12419	2022-04-14	2022-07-20	FARM2SEEDNUR	30°20'26"S 51°14'56"W
CHESTNUT-BELLIED SEED-FINCH	NI	SILVER.SISPASS RSA 2.6 006562	2022-04-14	2022-07-20	FARM2SEEDNUR	30°20'26"S 51°14'56"W
CHESTNUT-BELLIED SEED-FINCH	NI	SILVER.IBAMA OA 2.6 326070	2022-04-14	2022-07-20	FARM2SEEDNUR	30°20'26"S 51°14'56"W
CHESTNUT-BELLIED SEED-FINCH	NI	SILVER.SISPASS RSA 2.5 00846	2022-04-14	2022-07-20	FARM2SEEDNUR	30°20'26"S 51°14'56"W
CHESTNUT-BELLIED SEED-FINCH	NI	SILVER.SISPASS RSA 2.5 006561	2022-04-14	2022-07-20	FARM2SEEDNUR	30°20'26"S 51°14'56"W
CHESTNUT-BELLIED SEED-FINCH	M	RED.CETAS 2018 2.4 12110	2022-04-14	2022-07-20	FARM2SEEDNUR	30°20'26"S 51°14'56"W
CHESTNUT-BELLIED SEED-FINCH	M	SILVER.IBAMA OA 2.6 6087408	2022-04-14	2022-07-20	FARM2SEEDNUR	30°20'26"S 51°14'56"W
CHESTNUT-BELLIED SEED-FINCH	M	SILVER.SISPASS RSA 2.5 010513	2022-04-14	2022-07-20	FARM2SEEDNUR	30°20'26"S 51°14'56"W
CHESTNUT-BELLIED SEED-FINCH	M	SILVER.IBAMA OA 2.6 330844	2022-04-14	2022-07-20	FARM2SEEDNUR	30°20'26"S 51°14'56"W
CHESTNUT-BELLIED SEED-FINCH	NI	RED.CETAS 2018 2.2 13012	2022-04-14	2022-07-20	FARM2SEEDNUR	30°20'26"S 51°14'56"W
CHESTNUT-BELLIED SEED-FINCH	NI	RED.CETAS 2018 2.2 12973	2022-04-14	2022-07-20	FARM2SEEDNUR	30°20'26"S 51°14'56"W
GOLDEN-WINGED CACIQUE	NI	RED.CETAS 2018 3.5 06673	2022-04-14	2022-07-20	FARM2SEEDNUR	30°20'26"S 51°14'56"W
GRASSLAND YELLOW FINCH	M	RED.CETAS 2018 2.4 12657	2022-04-14	2022-07-20	FARM2SEEDNUR	30°20'26"S 51°14'56"W
GRASSLAND YELLOW FINCH		RED.CETAS 2018 2.4 12773	2022-04-14	2022-07-20	FARM2SEEDNUR	30°20'26"S 51°14'56"W
DIADEMED TANAGER	NI	RED.CETAS 2018 2.8 12102	2022-04-14	2022-07-20	FARM3CAPYDAM	30°24'59"S 51°15'35"W
DIADEMED TANAGER	NI	SILVER.CETAS 2015 3.2 34049	2022-04-14	2022-07-20	FARM3CAPYDAM	30°24'59"S 51°15'35"W
DIADEMED TANAGER	NI	SILVER.CETAS 2015 3.2 34034	2022-04-14	2022-07-20	FARM3CAPYDAM	30°24'59"S 51°15'35"W
DIADEMED TANAGER	NI	RED.CETAS 2018 3.0 04201	2022-04-14	2022-07-20	FARM3CAPYDAM	30°24'59"S 51°15'35"W
DIADEMED TANAGER	M	GOLDEN.CEMAS 3.0 253	2022-04-14	2022-07-20	FARM3CAPYDAM	30°24'59"S 51°15'35"W
DIADEMED TANAGER	M	SILVER.CETAS 2015 3.2 34015	2022-04-14	2022-07-20	FARM3CAPYDAM	30°24'59"S 51°15'35"W
DIADEMED TANAGER	NI	SILVER.CETAS 2015 3.2 34014	2022-04-14	2022-07-20	FARM3CAPYDAM	30°24'59"S 51°15'35"W
DIADEMED TANAGER	NI	SILVER.CETAS 2015 3.2 34013	2022-04-14	2022-07-20	FARM3CAPYDAM	30°24'59"S 51°15'35"W
DIADEMED TANAGER	NI	SILVER.CETAS 2015 3.2 34012	2022-04-14	2022-07-20	FARM3CAPYDAM	30°24'59"S 51°15'35"W
DIADEMED TANAGER	NI	SILVER.CETAS 2015 3.2 34006	2022-04-14	2022-07-20	FARM3CAPYDAM	30°24'59"S 51°15'35"W
DIADEMED TANAGER	NI	SILVER.IBAMA 01-02 2.8 1209	2022-04-14	2022-07-20	FARM3CAPYDAM	30°24'59"S 51°15'35"W
DIADEMED TANAGER	NI	RED.CETAS 2018 3.0 04241	2022-04-14	2022-07-20	FARM3CAPYDAM	30°24'59"S 51°15'35"W
DIADEMED TANAGER	NI	RED.CETAS 2018 3.0 05951	2022-04-14	2022-07-20	FARM3CAPYDAM	30°24'59"S 51°15'35"W
BLUE-YELLOW TANAGER	NI	SILVER.CETAS.IBAMA 3.0 04325	2022-04-14	2022-07-20	FARM3CAPYDAM	30°24'59"S 51°15'35"W
SAYACA TANAGER	NI	SILVER.CETAS.IBAMA 3.0 04325	2022-04-14	2022-07-20	FARM3CAPYDAM	30°24'59"S 51°15'35"W
HOODED SISKIN	M	RED.CETAS 2018 2.0 03930	2022-06-28	2022-09-10	FARM2PATOSLAKE	30°25'02"S 51°15'42"W
HOODED SISKIN	M	RED.CETAS 2018 2.2 12819	2022-06-28	2022-09-10	FARM2PATOSLAKE	30°25'02"S 51°15'42"W
HOODED SISKIN	M	RED.CETAS 2018 2.4 12178	2022-06-28	2022-09-10	FARM2PATOSLAKE	30°25'02"S 51°15'42"W
HOODED SISKIN	M	RED.CETAS 2018 2.2 12802	2022-06-28	2022-09-10	FARM2PATOSLAKE	30°25'02"S 51°15'42"W
HOODED SISKIN	NI	SILVER.SISPASS 2.4 RSA 03579	2022-06-28	2022-09-10	FARM2PATOSLAKE	30°25'02"S 51°15'42"W
HOODED SISKIN	NI	SILVER.SISPASS 2.4 RSA 003031	2022-06-28	2022-09-10	FARM2PATOSLAKE	30°25'02"S 51°15'42"W
HOODED SISKIN	NI	RED.CETAS 2018 2.4 12789	2022-06-28	2022-09-10	FARM2PATOSLAKE	30°25'02"S 51°15'42"W
HOODED SISKIN	NI	RED.CETAS 2018 2.4 12791	2022-06-28	2022-09-10	FARM2PATOSLAKE	30°25'02"S 51°15'42"W
HOODED SISKIN	NI	RED.CETAS 2018 2.4 12792	2022-06-28	2022-09-10	FARM2PATOSLAKE	30°25'02"S 51°15'42"W
GRASSLAND YELLOW FINCH	M	RED.CETAS 2018 2.4 14143	2022-06-28	2022-09-10	FARM2PATOSLAKE	30°25'02"S 51°15'42"W
GRASSLAND YELLOW FINCH	M	RED.CETAS 2018 2.4 12171	2022-06-28	2022-09-10	FARM2PATOSLAKE	30°25'02"S 51°15'42"W
DOUBLE-COLLARED SEEDEATER	NI	RED.CETAS 2018 2.2 12820	2022-06-28	2022-09-10	FARM2PATOSLAKE	30°25'02"S 51°15'42"W
DOUBLE-COLLARED SEEDEATER	NI	RED.CETAS 2018 2.2 12812	2022-06-28	2022-09-10	FARM2PATOSLAKE	30°25'02"S 51°15'42"W
DOUBLE-COLLARED SEEDEATER	M	RED.CETAS 2018 2.2 12814	2022-06-28	2022-09-10	FARM2PATOSLAKE	30°25'02"S 51°15'42"W
DOUBLE-COLLARED SEEDEATER	M	RED.CETAS 2018 2.2 12815	2022-06-28	2022-09-10	FARM2PATOSLAKE	30°25'02"S 51°15'42"W
DOUBLE-COLLARED SEEDEATER	M	RED.CETAS 2018 2.4 21191	2022-06-28	2022-09-10	FARM2PATOSLAKE	30°25'02"S 51°15'42"W
DOUBLE-COLLARED SEEDEATER	NI	RED.CETAS 2018 2.4 21192	2022-06-28	2022-09-10	FARM2PATOSLAKE	30°25'02"S 51°15'42"W
DOUBLE-COLLARED SEEDEATER	M	RED.CETAS 2018 2.4 21193	2022-06-28	2022-09-10	FARM2PATOSLAKE	30°25'02"S 51°15'42"W
DOUBLE-COLLARED SEEDEATER	NI	RED.CETAS 2018 2.4 12818	2022-06-28	2022-09-10	FARM2PATOSLAKE	30°25'02"S 51°15'42"W
DOUBLE-COLLARED SEEDEATER	NI	RED.CETAS 2018 2.4 12177	2022-06-28	2022-09-10	FARM2PATOSLAKE	30°25'02"S 51°15'42"W
DOUBLE-COLLARED SEEDEATER	M	RED.CETAS 2018 2.4 12196	2022-06-28	2022-09-10	FARM2PATOSLAKE	30°25'02"S 51°15'42"W
DOUBLE-COLLARED SEEDEATER	M	RED.CETAS 2018 2.0 05650	2022-06-28	2022-09-10	FARM2PATOSLAKE	30°25'02"S 51°15'42"W
DOUBLE-COLLARED SEEDEATER	M	RED.CETAS 2018 2.2 12613	2022-06-28	2022-09-10	FARM2PATOSLAKE	30°25'02"S 51°15'42"W
DOUBLE-COLLARED SEEDEATER	NI	RED.CETAS 2018 2.2 12607	2022-06-28	2022-09-10	FARM2PATOSLAKE	30°25'02"S 51°15'42"W
DOUBLE-COLLARED SEEDEATER	NI	RED.CETAS 2018 2.2 12825	2022-06-28	2022-09-10	FARM2PATOSLAKE	30°25'02"S 51°15'42"W
RUSTY-COLLARED SEEDEATER	M	RED.CETAS 2018 2.4 12172	2022-06-28	2022-09-10	FARM2PATOSLAKE	30°25'02"S 51°15'42"W
RUSTY-COLLARED SEEDEATER	M	RED.CETAS 2018 2.2 12823	2022-06-28	2022-09-10	FARM2PATOSLAKE	30°25'02"S 51°15'42"W
RUSTY-COLLARED SEEDEATER	M	RED.CETAS 2018 2.2 12824	2022-06-28	2022-09-10	FARM2PATOSLAKE	30°25'02"S 51°15'42"W
RUSTY-COLLARED SEEDEATER	M	RED.CETAS 2018 2.4 12778	2022-06-28	2022-09-10	FARM2PATOSLAKE	30°25'02"S 51°15'42"W
RUSTY-COLLARED SEEDEATER	NI	RED.CETAS 2018 3.0 04230	2022-06-28	2022-09-10	FARM2PATOSLAKE	30°25'02"S 51°15'42"W
RUSTY-COLLARED SEEDEATER	NI	RED.CETAS 2018 2.6 21513	2022-06-28	2022-09-10	FARM2PATOSLAKE	30°25'02"S 51°15'42"W
RUSTY-COLLARED SEEDEATER	M	RED.CETAS 2018 2.8 26236	2022-06-28	2022-09-10	FARM2PATOSLAKE	30°25'02"S 51°15'42"W
RUSTY-COLLARED SEEDEATER	M	RED.CETAS 2018 2.6 12869	2022-06-28	2022-09-10	FARM2PATOSLAKE	30°25'02"S 51°15'42"W
RUBY-CROWNED TANAGER	M	RED.CETAS 2018 2.6 21516	2022-06-28	2022-09-10	FARM2PATOSLAKE	30°25'02"S 51°15'42"W
HOODED SISKIN	M	SILVER.SISPASS 2.4 00657	2022-07-04	2022-09-20	FARM2BORDER	30°24'37"S 51°14'56"W
HOODED SISKIN	M	RED.CETAS 2018 2.4 12768	2022-07-04	2022-09-20	FARM2BORDER	30°24'37"S 51°14'56"W
HOODED SISKIN	M	RED.CETAS 2018 2.4 12769	2022-07-04	2022-09-20	FARM2BORDER	30°24'37"S 51°14'56"W
HOODED SISKIN	NI	RED.CETAS 2018 2.4 12770	2022-07-04	2022-09-20	FARM2BORDER	30°24'37"S 51°14'56"W
HOODED SISKIN	M	RED.CETAS 2018 2.4 12771	2022-07-04	2022-09-20	FARM2BORDER	30°24'37"S 51°14'56"W
RUSTY-COLLARED SEEDEATER	M	RED.CETAS 2018 2.6 21747	2022-07-04	2022-09-20	FARM2BORDER	30°24'37"S 51°14'56"W
DOUBLE-COLLARED SEEDEATER	M	RED.CETAS 2018 2.4 12764	2022-07-04	2022-09-20	FARM2BORDER	30°24'37"S 51°14'56"W
DOUBLE-COLLARED SEEDEATER	M	RED.CETAS 2018 2.2 12602	2022-07-04	2022-09-20	FARM2BORDER	30°24'37"S 51°14'56"W
DOUBLE-COLLARED SEEDEATER	M	RED.CETAS 2018 2.4 13047	2022-07-04	2022-09-20	FARM2BORDER	30°24'37"S 51°14'56"W
DOUBLE-COLLARED SEEDEATER	NI	RED.CETAS 2018 2.2 12604	2022-07-04	2022-09-20	FARM2BORDER	30°24'37"S 51°14'56"W
DOUBLE-COLLARED SEEDEATER	M	RED.CETAS 2018 2.2 12601	2022-07-04	2022-09-20	FARM2BORDER	30°24'37"S 51°14'56"W
DOUBLE-COLLARED SEEDEATER	NI	SILVER.IBAMA.OA 2.2 245655	2022-07-12	2022-09-20	FARM2BORDER	30°24'37"S 51°14'56"W
DOUBLE-COLLARED SEEDEATER	NI	RED.CETAS 2018 2.0 04122	2022-07-04	2022-09-20	FARM2BORDER	30°24'37"S 51°14'56"W
DOUBLE-COLLARED SEEDEATER	NI	RED.CETAS 2018 2.0 12605	2022-07-04	2022-09-20	FARM2BORDER	30°24'37"S 51°14'56"W
DOUBLE-COLLARED SEEDEATER	M	SILVER.CETAS.IBAMA 2.5 1519	2022-07-04	2022-09-20	FARM2SEEDNUR	30°20'26"S 51°14'56"W
DOUBLE-COLLARED SEEDEATER	M	RED.CETAS 2018 2.4 12197	2022-07-04	2022-09-20	FARM2SEEDNUR	30°20'26"S 51°14'56"W
DOUBLE-COLLARED SEEDEATER	M	RED.CETAS 2018 2.0 03947	2022-07-04	2022-09-20	FARM2SEEDNUR	30°20'26"S 51°14'56"W
DOUBLE-COLLARED SEEDEATER	M	RED.CETAS 2018 2.0 03945	2022-07-04	2022-09-20	FARM2SEEDNUR	30°20'26"S 51°14'56"W
DOUBLE-COLLARED SEEDEATER	NI	RED.CETAS 2018 2.2 12828	2022-07-04	2022-09-20	FARM2SEEDNUR	30°20'26"S 51°14'56"W
DOUBLE-COLLARED SEEDEATER	NI	RED.CETAS 2018 2.4 12770	2022-07-04	2022-09-20	FARM2SEEDNUR	30°20'26"S 51°14'56"W
DOUBLE-COLLARED SEEDEATER	NI	RED.CETAS 2018 2.4 12772	2022-07-04	2022-09-20	FARM2SEEDNUR	30°20'26"S 51°14'56"W
DOUBLE-COLLARED SEEDEATER	NI	RED.CETAS 2018 2.2 12606	2022-07-04	2022-09-20	FARM2SEEDNUR	30°20'26"S 51°14'56"W
DOUBLE-COLLARED SEEDEATER	NI	RED.CETAS 2018 2.2 12610	2022-07-04	2022-09-20	FARM2SEEDNUR	30°20'26"S 51°14'56"W
GOLDEN-RUMPED EUPHONIA	M	RED.CETAS 2018 2.4 12838	2022-07-12	2022-09-20	FARM2SEEDNUR	30°20'26"S 51°14'56"W
GOLDEN-RUMPED EUPHONIA	M	RED.CETAS 2018 2.4 12643	2022-07-12	2022-09-20	FARM2SEEDNUR	30°20'26"S 51°14'56"W
GOLDEN-RUMPED EUPHONIA	NI	RED.CETAS 2018 2.4 12634	2022-07-12	2022-09-20	FARM2SEEDNUR	30°20'26"S 51°14'56"W
RUBY-CROWNED TANAGER	M	RED.CETAS 2018 2.8 26871	2022-07-12	2022-09-20	FARM2SEEDNUR	30°20'26"S 51°14'56"W
DIADEMED TANAGER	M	RED.CETAS 2018 2.8 26875	2022-07-12	2022-09-20	FARM2SEEDNUR	30°20'26"S 51°14'56"W
DIADEMED TANAGER	M	RED.CETAS 2018 2.8 26870	2022-07-12	2022-09-20	FARM2SEEDNUR	30°20'26"S 51°14'56"W
DIADEMED TANAGER	M	RED.CETAS 2018 3.0 04334	2022-07-12	2022-09-20	FARM2SEEDNUR	30°20'26"S 51°14'56"W
DIADEMED TANAGER	M	RED.CETAS 2018 2.8 26234	2022-07-12	2022-09-20	FARM2SEEDNUR	30°20'26"S 51°14'56"W
DIADEMED TANAGER	NI	RED.CETAS 2018 2.6 21516	2022-07-12	2022-09-20	FARM2SEEDNUR	30°20'26"S 51°14'56"W
DIADEMED TANAGER	NI	RED.CETAS 2018 3.0 04238	2022-07-12	2022-09-20	FARM2SEEDNUR	30°20'26"S 51°14'56"W
DIADEMED TANAGER	NI	RED.CETAS 2018 2.8 26878	2022-07-12	2022-09-20	FARM2SEEDNUR	30°20'26"S 51°14'56"W
DIADEMED TANAGER	M	RED.CETAS 2018 2.6 21755	2022-07-12	2022-09-20	FARM2SEEDNUR	30°20'26"S 51°14'56"W
DIADEMED TANAGER	M	SILVER.IBAMA OA 2.8 457586	2022-07-12	2022-09-20	FARM2SEEDNUR	30°20'26"S 51°14'56"W
YELLOW-RUMPED MARSHBIRD	NI	SILVER.CETAS 2018 5.5 02884	2022-07-12	2022-09-20	FARM2SEEDNUR	30°20'26"S 51°14'56"W

## Sheet: species
BLACK-AND-RUFOUS WARBLING-FINCH	Poospiza nigrorufa
BLACK-THROATED GROSBEAK	Saltator fuliginosus
BLUE-AND-YELLOW TANAGER	Rauenia bonariensis
BLUE-and-BLACK GRASSQUIT	Volatinia jaccarina
BRAZILIAN TANAGER	Ramphocelus bresilia
BUFFY-FRONTED SEEDEATER	Sporophila frontalis
COCOA THRUSH	Turdus fumigatus
CHOPI BLACKBIRD	Gnorimopsar chopi
CINNAMON TANAGER	Schistochlamys ruficapillus
CHESTNUT-BACKED TANAGER	Tangara preciosa
CHESTNUT-BELLIED EUPHONIA	Euphonia pectoralis
CHESTNUT-BELLIED SEED-FINCH	Sporophila angolensis
COMMON WAXBILL	Estrilda astrid
CREAMY-BELLIED THRUSH	Turdus amaurochalinus
DOUBLE-COLLARED SEEDEATER	Sporophila caerulescens
DIADEMED TANAGER	Stephanophorus diadematus
GLAUCUS-BLUE GROSBEAK	Cyanoloxia glaucocaerula
GOLDEN-BILLED SALTATOR	Saltator aurantirostris
GOLDEN-RUMPED EUPHONIA	Cyanophonia cyanocephala
GOLDEN-WINGED CACIQUE	Cacicus chrysopterus
GRASSLAND YELLOW FINCH	Sicalis luteola
GREAT KISKADEE	Pitangus sulphuratus
GRAY-THROATED WARBLING-FINCH	Microspingus cabanisi
GUIRA TANAGER	Hemithraupis guira
HOODED SISKIN	Spinus magellanicus
MARSH SEEDEATER	Sporophila palustris
PEARLY-BELLIED SEEDEATER	Sporophila pileata
RED-RUMPED CACIQUE	Cacicus haemohrrous
RUFOUS-BELLIED THRUSH	Turdus rufiventris
RUFOUS-COLLARED SPARROW	Zonotrichia capensis
RUBY-CROWNED TANAGER	Tachyphonus coronatus
RUSTY-COLLARED SEEDEATER	Sporophila collaris
SAYACA TANAGER	Thraupis sayaca
SHINY COWBIRD	Molothrus bonariensis
SWALLOW TANAGER	Tersina viridis
SWALLOW-TAILED MANAKIN	Chiroxiphia caudata
UNIFORM FINCH	Haplospiza unicolor
YELLOW-BILLED CARDINAL	Paroaria capitata
YELLOW-LEGGED THRUSH	Turdus flavipes
YELLOW-RUMPED MARSHBIRD	Pseudoleistes guirahuro
