# Supplementary material for: Rehabilitation and release of confiscated songbirds into the wild: A pilot study
Source: Front Vet Sci. 2023 Mar 30;10:1109568. doi: 10.3389/fvets.2023.1109568 (PMC10098152; doi:10.3389/fvets.2023.1109568)
Supplement: Supplementary Table 4 — Health tests. [file Table_4.XLSX]

## Sheet: Health tests
DATE	SPECIES	LEG BAND	HI NDV	Salmonella	PCR MG	PSE - POOLS
2018-10-18	SAFFRON FINCH	GOLDEN.CEMAS-UFRGS 2.8 303	X	NEG	NEG
2018-10-18	SAFFRON FINCH	GOLDEN.CEMAS-UFRGS 2.8 305	X	NEG	NEG
2018-10-18	SAFFRON FINCH	GOLDEN.CEMAS-UFRGS 2.8 307	X	NEG	NEG
2018-10-18	SAFFRON FINCH	GOLDEN.CEMAS-UFRGS 2.8 311	X	NEG	NEG	24 OOCYSTS
2018-10-18	SAFFRON FINCH	GOLDEN.CEMAS-UFRGS 2.8 321	X	NEG	NEG	ISOSPORA
2018-10-18	SAFFRON FINCH	GOLDEN.CEMAS-UFRGS 3.0 365	X	NEG	NEG
2018-10-18	SAFFRON FINCH	GOLDEN.CEMAS-UFRGS 2.8 321	X	NEG	NEG
2018-10-18	SAFFRON FINCH	GOLDEN.CEMAS-UFRGS 3.0 365	X	NEG	NEG
2018-10-18	RC CARDINAL	RED.CEMAS-UFRGS 3.5 429	NEG	NEG	NEG
2018-10-18	RC CARDINAL	RED.CEMAS-UFRGS 3.5 432	NEG	NEG	NEG
2018-10-18	RC CARDINAL	RED.CEMAS-UFRGS 3.5 411	NEG	NEG	NEG
2018-10-18	RC CARDINAL	RED.CEMAS-UFRGS 3.5 414	NEG	NEG	NEG
2018-10-18	RC CARDINAL	RED.CEMAS-UFRGS 3.5 415	NEG	NEG	NEG
2018-10-18	RC CARDINAL	RED.CEMAS-UFRGS 3.5 420	NEG	NEG	NEG	UNCOUNTABLE
2018-10-18	RC CARDINAL	RED.CEMAS-UFRGS 3.5 423	NEG	NEG	NEG	OOCYSTS
2018-10-18	RC CARDINAL	RED.CEMAS-UFRGS 3.5 426	NEG	NEG	NEG	ISOSPORA
2018-10-18	RC CARDINAL	RED.CEMAS-UFRGS 3.5 428	NEG	NEG	NEG	Capillaria
2018-10-18	RC CARDINAL	RED.CEMAS-UFRGS 3.5 430	NEG	NEG	NEG
2018-10-18	RC CARDINAL	RED.CEMAS-UFRGS 4.0 535	NEG	NEG	NEG
2018-10-18	RC CARDINAL	RED.CEMAS-UFRGS 4.0 521	NEG	NEG	NEG
2018-10-18	BRA TANAGER	SILVER.CETAS 2015 3.2 30752	X	NEG	NEG
2018-10-18	BRA TANAGER	SILVER.CETAS 2015 3.2 30754	X	NEG	NEG
2018-10-18	BRA TANAGER	SILVER.CETAS 2015 3.2 30756	X	NEG	NEG	11 OOCYSTS
2018-10-18	BRA TANAGER	SILVER.CETAS 2015 3.2 30760	X	NEG	NEG	ISOSPORA
2018-10-18	BRA TANAGER	SILVER.CETAS 2015 3.2 30775	X	NEG	NEG
2019-02-12	CB SEED FINCH	GOLDEN.CEMAS-UFRGS 2.8 319	X	NEG	NEG
2019-02-12	CB SEED FINCH	GOLDEN.CEMAS-UFRGS 2.6 260	X	NEG	NEG
2019-02-12	CB SEED FINCH	GOLDEN.CEMAS-UFRGS 2.6 264	X	NEG	NEG
2019-02-12	CB SEED FINCH	GOLDEN.CEMAS-UFRGS 2.6 262	X	NEG	NEG
2019-02-12	CB SEED FINCH	GOLDEN.CEMAS-UFRGS 2.6 266	X	NEG	NEG	UNCOUNTABLE
2019-02-12	CB SEED FINCH	GOLDEN.CEMAS-UFRGS 2.6 267	X	NEG	NEG	OOCYSTS
2019-02-12	CB SEED FINCH	GOLDEN.CEMAS-UFRGS 2.6 268	X	NEG	NEG	ISOSPORA
2019-02-12	CB SEED FINCH	GOLDEN.CEMAS-UFRGS 2.6 269	X	NEG	NEG
2019-02-12	CB SEED FINCH	BLUE.CEMAS-UFRGS 2.5 030	X	NEG	NEG	Acuaria
2019-02-12	CB SEED FINCH	BLUE.CEMAS-UFRGS 2.5 027	X	NEG	NEG
2019-02-12	CB SEED FINCH	SILVER.SISPASS 2.6 005628	X	NEG	NEG
2019-05-06	RC CARDINAL	SILVER.CETAS 2015 3.2 30181	NEG	NEG	NEG
2019-05-06	RC CARDINAL	SILVER.CETAS 2015 3.2 30198	NEG	NEG	NEG
2019-05-06	RC CARDINAL	SILVER.CETAS 2015 3.5 30111	NEG	NEG	NEG
2019-05-06	RC CARDINAL	SILVER.CETAS 2015 3.5 30186	NEG	NEG	NEG
2019-05-06	RC CARDINAL	SILVER.SISPASS RSA 3.5 005209	NEG	NEG	NEG	85 OOCYSTS
2019-05-06	RC CARDINAL	SILVER.CETAS.IBAMA 3.5 1570	NEG	NEG	NEG	ISOSPORA
2019-05-06	RC CARDINAL	SILVER.CETAS.IBAMA 3.5 20685	NEG	NEG	NEG
2019-05-06	RC CARDINAL	RED.CEMAS-UFRGS 3.5 492	NEG	NEG	NEG
2019-05-06	RC CARDINAL	RED.CEMAS-UFRGS 3.5 499	NEG	NEG	NEG
2019-05-06	RC CARDINAL	RED.CEMAS-UFRGS 3.5 528	NEG	NEG	NEG
2019-05-06	RC FINCH	GOLDEN.CEMAS-UFRGS 2.8 345	X	NEG	NEG
2019-05-06	RC FINCH	GOLDEN.CEMAS-UFRGS 2.8 346	X	NEG	NEG
2019-05-06	RC FINCH	GOLDEN.CEMAS-UFRGS 3.0 362	X	NEG	NEG	NEG
2019-05-06	RC FINCH	GOLDEN.CEMAS-UFRGS 3.0 385	X	NEG	NEG
2019-05-06	RC FINCH	GOLDEN.CEMAS-UFRGS 2.5 046	X	NEG	NEG
2019-05-06	GW SALTATOR	RED.CEMAS-UFRGS 4.0 512	NEG	NEG	NEG
2019-05-06	GW SALTATOR	RED.CEMAS-UFRGS 4.0 514	NEG	NEG	NEG
2019-05-06	GW SALTATOR	RED.CEMAS-UFRGS 4.0 519	NEG	NEG	NEG	104 OOCYSTS
2019-05-06	GW SALTATOR	RED.CEMAS-UFRGS 4.0 523	NEG	NEG	NEG	ISOSPORA
2019-05-06	GW SALTATOR	RED.CEMAS-UFRGS 4.0 525	NEG	NEG	NEG
2019-05-06	GW SALTATOR	RED.CEMAS-UFRGS 4.0 527	NEG	NEG	NEG
2019-05-06	GW SALTATOR	RED.CEMAS-UFRGS 4.0 547	NEG	NEG	NEG
2019-09-22	RC FINCH	PURPLE.CEMAS-UFRGS 2.5 091	X	NEG	NEG
2019-09-23	RC FINCH	RED.CEMAS-UFRGS 2.5 123	X	NEG	NEG
2019-09-23	RC FINCH	GOLDEN.CEMAS-UFRGS 2.6 261	X	NEG	NEG	NEG
2019-09-23	RC FINCH	RED.CEMAS-UFRGS 2.5 132	X	NEG	NEG
2019-09-23	RC FINCH	RED.CEMAS-UFRGS 2.5 133	X	NEG	NEG
2019-09-23	SAFFRON FINCH	SILVER.CETAS.IBAMA 2.8 0724	X	NEG	NEG
2019-09-23	SAFFRON FINCH	SILVER.CEMAS-UFRGS 2.5 073	X	NEG	NEG
2019-09-23	SAFFRON FINCH	BLUE.CEMAS-UFRGS 2.5 036	X	NEG	NEG
2019-09-23	SAFFRON FINCH	SILVER.CEMAS-UFRGS 2.5 078	X	NEG	NEG
2019-09-23	SAFFRON FINCH	BLUE.CEMAS-UFRGS 2.5 039	X	NEG	NEG
2019-09-23	SAFFRON FINCH	RED.CEMAS-UFRGS 2.5 129	X	NEG	NEG	50 OOCYSTS
2019-09-23	SAFFRON FINCH	PURPLE.CEMAS-UFRGS 2.5 099	X	NEG	NEG	ISOSPORA
2019-09-23	SAFFRON FINCH	PURPLE.CEMAS-UFRGS 2.5 056	X	NEG	NEG
2019-09-23	SAFFRON FINCH	RED.CETAS 2018 2.2 07950	X	NEG	NEG
2019-09-23	SAFFRON FINCH	GOLDEN.CEMAS-UFRGS 2.5 013	X	NEG	NEG
2019-09-23	SAFFRON FINCH	RED.CETAS 2018 2.5 01999	X	NEG	NEG
2019-09-23	SAFFRON FINCH	GOLDEN.CEMAS-UFRGS 2.5 012	X	NEG	NEG
2019-09-23	GW SALTATOR	SILVER.IBAMA OA 3.5 454457	NEG	NEG	NEG
2019-09-23	GW SALTATOR	PURPLE.CEMAS-UFRGS 3.5 625	NEG	NEG	NEG
2019-09-23	GW SALTATOR	GOLDEN.CEMAS-UFRGS 3.5 461	NEG	NEG	NEG
2019-09-23	GW SALTATOR	BLUE.CEMAS-UFRGS 3.5 472	NEG	NEG	NEG	75 OOCYSTS
2019-09-23	GW SALTATOR	GOLDEN.CEMAS-UFRGS 3.5 564	NEG	NEG	NEG	ISOSPORA
2019-09-23	GW SALTATOR	GOLDEN.CEMAS-UFRGS 3.5 421	NEG	NEG	NEG
2019-09-23	GW SALTATOR	GOLDEN.CEMAS-UFRGS 3.5 466	NEG	NEG	NEG
2019-09-23	GW SALTATOR	BLUE.CEMAS-UFRGS 3.5 474	NEG	NEG	NEG
2019-09-23	GW SALTATOR	PURPLE.CEMAS-UFRGS 3.5 628	NEG	NEG	NEG
2020-01-23	GW SALTATOR	SILVER.SISPASS RSA 3.5 007543	NEG	NEG	NEG
2020-01-23	GW SALTATOR	SILVER.SISPASS RSA 3.5 008007	NEG	NEG	NEG
2020-01-23	GW SALTATOR	SILVER.SISPASS RSA 3.5 012223	NEG	NEG	NEG
2020-01-23	GW SALTATOR	SILVER.SISPASS RSA 3.5 013434	NEG	NEG	NEG
2020-01-23	GW SALTATOR	SILVER.IBAMA 03-04 3,5 019479	NEG	NEG	NEG
2020-01-23	GW SALTATOR	SILVER.CETAS.IBAMA 3.5 1024	NEG	NEG	NEG
2020-01-23	GW SALTATOR	SILVER.CETAS.IBAMA 3.8 1028	NEG	NEG	NEG
2020-01-23	GW SALTATOR	SILVER.IBAMA OA 3.5 160178	NEG	NEG	NEG	94 OOCYSTS
2020-01-23	GW SALTATOR	RED.CETAS 3.5 2018 10328	NEG	NEG	NEG	ISOSPORA
2020-01-23	GW SALTATOR	RED.CETAS 2018 3.5 10323	NEG	NEG	NEG
2020-01-23	GW SALTATOR	RED.CETAS 2018 3.5 10341	IV	NEG	NEG
2020-01-23	GW SALTATOR	RED.CETAS 2018 3.5 10344	NEG	NEG	NEG
2020-01-23	GW SALTATOR	RED.CETAS 2018 3.5 10345	NEG	NEG	NEG
2020-01-23	GW SALTATOR	RED.CETAS 2018 3.5 10347	NEG	NEG	NEG
2020-01-23	GW SALTATOR	RED.CETAS 2018 3.5 10350	NEG	NEG	NEG
2020-01-23	RC CARDINAL	SILVER.IBAMA OA 3.5 284656	NEG	NEG	NEG
2020-01-23	RC CARDINAL	SILVER.IBAMA OA 3.5 0340	NEG	NEG	NEG
2020-01-23	RC CARDINAL	SILVER.CETAS.IBAMA 2015 3.8 1025	NEG	NEG	NEG
2020-01-23	RC CARDINAL	SILVER.CETAS.IBAMA 2015 3.5 1027	NEG	NEG	NEG	27 OOCYSTS
2020-01-23	RC CARDINAL	RED.CETAS 2018 3.5 10325	NEG	NEG	NEG	ISOSPORA
2020-01-23	RC CARDINAL	RED.CETAS 2018 3.5 10326	NEG	NEG	NEG
2020-01-23	RC CARDINAL	RED.CETAS 2018 3.5 10329	NEG	NEG	NEG
2020-01-23	RC CARDINAL	RED.CETAS 2018 3.5 10327	NEG	NEG	NEG
2020-01-23	RC CARDINAL	RED.CETAS 2018 4.0 04851	NEG	NEG	NEG
2020-01-23	RC CARDINAL	RED.CETAS 2018 3.5 10439	NEG	NEG	NEG
2020-07-13	GW SALTATOR	RED.CETAS 2018 3.8 01520	NEG	NEG	NEG
2020-07-13	GW SALTATOR	RED.CETAS 2018 3.8 01584	NEG	NEG	NEG
2020-07-13	GW SALTATOR	RED.CETAS 2018 3.2 04718	NEG	NEG	NEG
2020-07-13	GW SALTATOR	RED.CETAS 2018 3.2 04849	NEG	NEG	NEG	NEG
2020-07-13	GW SALTATOR	RED.CETAS 2018 3.5 06497	NEG	NEG	NEG
2020-07-13	GW SALTATOR	RED.CETAS 2018 3.2 04856	NEG	NEG	NEG
2020-07-13	GW SALTATOR	RED.CETAS 2018 3.5 10767	IV	NEG	NEG
2020-07-13	GW SALTATOR	RED.CETAS 2018 3.8 01529	NEG	NEG	NEG
2020-07-13	GW SALTATOR	RED.CETAS 2018 3.2 04852	NEG	NEG	NEG
2020-07-13	RC CARDINAL	RED.CETAS 2018 3.8 01503	NEG	NEG	NEG
2020-07-13	RC CARDINAL	RED.CETAS 2018 3.8 01506	NEG	NEG	NEG
2020-07-13	RC CARDINAL	RED.CETAS 2018 3.8 01509	NEG	NEG	NEG
2020-07-13	RC CARDINAL	RED.CETAS 2018 3.8 01513	NEG	NEG	NEG	163 OOCYSTS
2020-07-13	RC CARDINAL	RED.CETAS 2018 3.8 01514	NEG	NEG	NEG	ISOSPORA
2020-07-13	RC CARDINAL	RED.CETAS 2018 3.5 10778	NEG	NEG	NEG
2020-07-13	RC CARDINAL	RED.CETAS 2018 3.5 10743	NEG	NEG	NEG
2020-07-13	RC CARDINAL	PURPLE.CEMAS-UFRGS 3.5 646	NEG	NEG	NEG
2020-07-13	RC CARDINAL	RED.CETAS 2018 3.5 10740	NEG	NEG	NEG
2020-07-13	RC CARDINAL	RED.CETAS 2018 3.8 01515	NEG	NEG	NEG
2020-07-13	RC CARDINAL	RED.CEMAS-UFRGS 3.5 444	NEG	NEG	NEG
2020-07-10	ULTR GROSBEAK	RED.CETAS 2018 3.0 02262	X	NEG	NEG
2020-07-10	ULTR GROSBEAK	RED.CETAS 2018 2.6 11707	X	NEG	NEG
2020-07-10	ULTR GROSBEAK	RED.CETAS 2018 2.6 11721	X	NEG	NEG
2020-07-10	ULTR GROSBEAK	RED.CETAS 2018 2.8 08443	X	NEG	NEG	NEG
2020-07-10	ULTR GROSBEAK	SILVER.SISPASS 2.8 006087	X	NEG	NEG
2020-07-10	ULTR GROSBEAK	SILVER.SISPASS RSA 2.8 006007	X	NEG	NEG
2020-07-10	ULTR GROSBEAK	SILVER.CETAS 2015 3.2 30388	X	NEG	NEG
2020-07-10	SAFFRON FINCH	RED.CETAS 2018 2.6 11723	X	NEG	NEG
2020-07-10	SAFFRON FINCH	RED.CETAS 2018 2.5 02051	X	NEG	NEG
2020-07-10	SAFFRON FINCH	RED.CETAS 2018 2.6 11641	X	NEG	NEG
2020-07-10	SAFFRON FINCH	RED.CETAS 2018 2.6 07866	X	NEG	NEG
2020-07-10	SAFFRON FINCH	RED.CETAS 2018 2.5 07853	X	NEG	NEG	NEG
2020-07-10	SAFFRON FINCH	RED.CETAS 2018 2.5 01874	X	NEG	NEG
2020-07-10	SAFFRON FINCH	RED.CETAS 2018 2.6 11644	X	NEG	NEG
2020-07-10	SAFFRON FINCH	RED.CETAS 2018 2.6 11738	X	NEG	NEG
2020-07-10	SAFFRON FINCH	RED.CETAS 2018 2.5 01869	X	NEG	NEG
2020-09-14	ULTR GROSBEAK	RED.CETAS 2018 2.8 08352	X	NEG	NEG
2020-09-14	ULTR GROSBEAK	SILVER.IBAMA OA 2.8 341155	X	NEG	NEG
2020-09-14	ULTR GROSBEAK	RED.CETAS 2018 2.8 08690	X	NEG	NEG
2020-09-14	ULTR GROSBEAK	RED.CETAS 2018 2.8 08660	X	NEG	NEG
2020-09-14	ULTR GROSBEAK	RED.CETAS 2018 3.2 05060	X	NEG	NEG
2020-09-14	ULTR GROSBEAK	RED.CETAS 2018 2.8 12647	X	NEG	NEG
2020-09-14	ULTR GROSBEAK	SILVER.SISPASS RSA 2.8 009806	X	NEG	NEG	146 OOCYSTS
2020-09-14	ULTR GROSBEAK	SILVER.IBAMA OA 2.8 412114	X	NEG	NEG	ISOSPORA
2020-09-14	ULTR GROSBEAK	SILVER.IBAMA OA 2.8 543685	X	NEG	NEG
2020-09-14	ULTR GROSBEAK	RED.CETAS 2018 2.8 12646	X	NEG	NEG
2020-09-14	ULTR GROSBEAK	SILVER.SISPASS RSA 2.8 006941	X	NEG	NEG
2020-09-14	ULTR GROSBEAK	RED.CETAS 2018 2.8 12644	X	NEG	NEG
2020-09-14	ULTR GROSBEAK	SILVER.SISPASS 2.8 RSA 022325	X	NEG	NEG
2020-09-14	ULTR GROSBEAK	SILVER.IBAMA OA 2.8 543566	X	NEG	NEG
2020-09-14	ULTR GROSBEAK	SILVER.SISPASS 2.8 RSA 020490	X	NEG	NEG
2020-09-14	ULTR GROSBEAK	RED.CETAS 2018 2.8 08400	X	NEG	NEG
2020-09-14	SAFFRON FINCH	RED.CETAS 2018 2.0 05663	X	NEG	NEG
2020-09-14	SAFFRON FINCH	RED.CETAS 2018 2.0 05335	X	NEG	NEG
2020-09-14	SAFFRON FINCH	RED.CETAS 2018 2.2 08342	X	NEG	NEG
2020-09-14	SAFFRON FINCH	RED.CETAS 2018 2.4 08541	X	NEG	NEG
2020-09-14	SAFFRON FINCH	RED.CETAS 2018 2.6 07830	X	NEG	NEG
2020-09-14	SAFFRON FINCH	RED.CETAS 2018 2.2 08346	X	NEG	NEG
2020-09-14	SAFFRON FINCH	RED.CETAS 2018 2.4 08510	X	NEG	NEG
2020-09-14	SAFFRON FINCH	RED.CETAS 2018 2.4 08571	X	NEG	NEG	69 OOCYSTS
2020-09-14	SAFFRON FINCH	RED.CETAS 2018 2.4 08535	X	NEG	NEG	ISOSPORA
2020-09-14	SAFFRON FINCH	RED.CETAS 2018 2.5 01789	X	NEG	NEG
2020-09-14	SAFFRON FINCH	RED.CETAS 2018 2.4 08694	X	NEG	NEG
2020-09-14	SAFFRON FINCH	RED.CETAS 2018 2.6 07833	X	NEG	NEG
2020-09-14	SAFFRON FINCH	RED.CETAS 2018 2.5 01790	X	NEG	NEG
2020-09-14	SAFFRON FINCH	SILVER.SISPASS 2.8 RSA 021368	X	NEG	NEG
2020-09-14	SAFFRON FINCH	RED.CETAS 2018 2.4 08529	X	NEG	NEG
2020-09-14	SAFFRON FINCH	RED.CETAS 2018 2.6 07841	X	NEG	NEG
2020-09-14	SAFFRON FINCH	RED.CETAS 2018 2.4 08562	X	NEG	NEG
2020-12-10	RC CARDINAL	RED.CETAS 2018 3.5 06571	NEG	NEG	NEG
2020-12-10	RC CARDINAL	RED.CETAS 2018 3.5 06582	NEG	NEG	NEG
2020-12-10	RC CARDINAL	RED.CETAS 2018 3.5 06563	NEG	NEG	NEG	NEG
2020-12-10	RC CARDINAL	RED.CETAS 2018 3.5 06562	NEG	NEG	NEG
2020-12-10	RC CARDINAL	RED.CETAS 2018 3.5 06596	NEG	NEG	NEG
2020-12-10	RC CARDINAL	RED.CETAS 2018 3.5 06588	NEG	NEG	NEG
2020-12-10	GW SALTATOR	RED.CETAS 2018 3.5 06589	NEG	NEG	NEG
2020-12-10	GW SALTATOR	SILVER.IBAMA OA 3.5 385968	NEG	NEG	NEG
2020-12-10	GW SALTATOR	SILVER.SISPASS RSA 3.5 002437	NEG	NEG	NEG
2020-12-10	GW SALTATOR	SILVER.IBAMA OA 3.5 484814	NEG	NEG	NEG	40 OOCYSTS
2020-12-10	GW SALTATOR	SILVER.IBAMA OA 3.5 584015	NEG	NEG	NEG	ISOSPORA
2020-12-10	GW SALTATOR	SILVER.IBAMA OA 3.5 454297	NEG	NEG	NEG
2020-12-10	GW SALTATOR	SILVER.IBAMA OA 3.5 474350	NEG	NEG	NEG
2020-12-10	GW SALTATOR	RED.CETAS 2018 3.5 06577	NEG	NEG	NEG
2020-12-10	GW SALTATOR	SILVER.IBAMA 01-02 3.5 0925	NEG	NEG	NEG
2020-12-10	ULTR GROSBEAK	SILVER.SISPASS RSA 2.8 013349	X	NEG	NEG
2020-12-10	ULTR GROSBEAK	SILVER.SISPASS RSA 2.8 035956	X	NEG	NEG
2020-12-10	ULTR GROSBEAK	SILVER.SISPASS RSA 2.8 023621	X	NEG	NEG
2020-12-10	ULTR GROSBEAK	SILVER.SISPASS RSA 2.8 011928	X	NEG	NEG
2020-12-10	ULTR GROSBEAK	SILVER.SISPASS RSA 2.8 025417	X	NEG	NEG
2020-12-10	ULTR GROSBEAK	SILVER.SISPASS RSA 2.8 016904	X	NEG	NEG
2020-12-10	ULTR GROSBEAK	SILVER.SISPASS RSA 2.8 008673	X	NEG	NEG
2020-12-10	ULTR GROSBEAK	SILVER.SISPASS RSA 2.8 013350	X	NEG	NEG
2020-12-10	ULTR GROSBEAK	SILVER.SISPASS RSA 2.8 025415	X	NEG	NEG	33 OOCYSTS
2020-12-10	ULTR GROSBEAK	SILVER.IBAMA 04-05 2.8 159872	X	NEG	NEG	ISOSPORA
2020-12-10	ULTR GROSBEAK	SILVER.CETAS.IBAMA 2.6 2292	X	NEG	NEG
2020-12-10	ULTR GROSBEAK	RED.CETAS 2018 2.6 12269	X	NEG	NEG
2020-12-10	ULTR GROSBEAK	SILVER.IBAMA OA 2.8 229176	X	NEG	NEG
2020-12-10	ULTR GROSBEAK	RED.CETAS 2018 2.6 12262	X	NEG	NEG
2020-12-10	ULTR GROSBEAK	RED.CETAS 2018 2.6 12263	X	NEG	NEG
2020-12-10	ULTR GROSBEAK	RED.CETAS 2018 3.0 04602	X	NEG	NEG
2020-12-10	ULTR GROSBEAK	RED.CETAS 2018 2.6 12417	X	NEG	NEG
2020-12-10	ULTR GROSBEAK	SILVER.SISPASS.RSA 2.8 031042	X	NEG	NEG
2020-12-10	ULTR GROSBEAK	SILVER.CETAS.IBAMA 2.8 2227	X	NEG	NEG
2021-04-05	RC CARDINAL	RED.CETAS 2018 3.5 2018 10332	NEG	NEG	POS
2021-04-05	RC CARDINAL	SILVER.SISPASS RSA 3.5 4774246	NEG	NEG	NEG
2021-04-05	RC CARDINAL	RED.CETAS 2018 3.5 2018 10333	NEG	NEG	POS
2021-04-05	RC CARDINAL	RED.CETAS 2018 3.5 2018 10335	NEG	NEG	POS	98 OOCYSTS
2021-04-05	RC CARDINAL	SILVER.CETAS.IBAMA 2015 7549	NEG	NEG	NEG	ISOSPORA
2021-04-05	RC CARDINAL	SILVER.CETAS.IBAMA 2015 3456	NEG	NEG	NEG
2021-04-05	RC CARDINAL	SILVER.IBAMA OA 3.5 019282	NEG	NEG	POS
2021-04-05	RC CARDINAL	SILVER.SISPASS RSA 3.5 494530	NEG	NEG	NEG
2021-04-05	RC CARDINAL	SILVER.SISPASS RSA 3.5 477424	NEG	NEG	NEG
2021-04-05	GW SALTATOR	RED.CETAS 2018 3.5 10339	NEG	NEG	NEG
2021-04-05	GW SALTATOR	RED.CETAS 2018 3.5 10338	NEG	NEG	NEG
2021-04-05	GW SALTATOR	RED.CETAS 2018 3.5 10337	NEG	NEG	NEG
2021-04-05	GW SALTATOR	RED.CETAS 2018 3.5 10331	NEG	NEG	POS
2021-04-05	GW SALTATOR	RED.CETAS 2018 3.5 10336	NEG	NEG	NEG
2021-04-05	GW SALTATOR	SILVER.SISPASS RSA 3.5 108408	NEG	NEG	NEG
2021-04-05	GW SALTATOR	RED.CETAS 3.5 2018 10334	NEG	NEG	POS	104 OOCYSTS
2021-04-05	GW SALTATOR	RED.CETAS 2018 3.5 10342	NEG	NEG	NEG	ISOSPORA
2021-04-05	GW SALTATOR	RED.CETAS 2018 3.5 10337	NEG	NEG	POS
2021-04-05	GW SALTATOR	RED.CETAS 2018 3.5 10340	NEG	NEG	NEG	Capillaria
2021-04-05	GW SALTATOR	SILVER.SISPASS RSA 3.5 007173	NEG	NEG	NEG
2021-04-05	GW SALTATOR	SIVER.SISPASS RSA 3.5 012319	NEG	NEG	NEG
2021-04-05	ULTR GROSBEAK	RED.CETAS 20118 2.5 01952	X	NEG	NEG
2021-04-05	ULTR GROSBEAK	RED.CETAS 2018 2.6 12328	X	NEG	NEG	NEG
2021-04-05	ULTR GROSBEAK	RED.CETAS 2018 2.6 12311	X	NEG	NEG
2021-04-05	ULTR GROSBEAK	RED.CETAS 2018 2.8 08743	X	NEG	NEG
2021-04-05	CB SEED FINCH	RED.CETAS 2018 2.6 11717	X	NEG	NEG	UNCOUNTABLE
2021-04-05	CB SEED FINCH	RED.CETAS 2018 2.6 11703	X	NEG	NEG	OOCYSTS
2021-04-05	CB SEED FINCH	SILVER.IBAMA OA 2.6 608279	X	NEG	NEG	ISOSPORA
2021-04-05	CB SEED FINCH	RED.CETAS 2018 2.5 01956	X	NEG	NEG	Acuaria
2021-04-05	SAFFRON FINCH	RED.CETAS 2018 2.8 13078	X	NEG	NEG
2021-04-05	SAFFRON FINCH	GOLDEN.CEMAS-UFRGS 3.0 157	X	NEG	NEG
2021-04-05	SAFFRON FINCH	SILVER.CETAS.IBAMA 2.8 2290	X	NEG	NEG
2021-04-05	SAFFRON FINCH	RED.CETAS 2018 2.8 13076	X	NEG	NEG	NEG
2021-04-05	SAFFRON FINCH	PURPLE.CEMAS-UFRGS 3.0 327	X	NEG	NEG
2021-04-05	SAFFRON FINCH	RED.CETAS 2018 2.4 12877	X	NEG	NEG
2021-04-05	SAFFRON FINCH	GOLDEN.CEMAS-UFRGS 3.0 232	X	NEG	NEG
2021-04-05	SAFFRON FINCH	RED.CETAS 2018 2.4 08323	X	NEG	NEG
2021-12-10	SAFFRON FINCH	RED.CETAS 2018 2.4 12855	X	NEG	NEG
2021-12-10	SAFFRON FINCH	RED.CETAS 2018 2.4 12858	X	NEG	NEG
2021-12-10	SAFFRON FINCH	RED.CETAS 2018 2.4 12107	X	NEG	NEG
2021-12-10	SAFFRON FINCH	SILVER.SISPASS RSA 2.8 028483	X	NEG	NEG
2021-12-10	SAFFRON FINCH	RED.CETAS 2018 2.6 12430	X	NEG	NEG
2021-12-10	SAFFRON FINCH	RED.CETAS 2018 2.6 12294	X	NEG	NEG
2021-12-10	SAFFRON FINCH	RED.CETAS 2018 2.6 08219	X	NEG	NEG
2021-12-10	SAFFRON FINCH	RED.CETAS 2018 2.4 12856	X	NEG	NEG	87 OOCYSTS
2021-12-10	SAFFRON FINCH	RED.CETAS 2018 2.4 12858	X	NEG	NEG	ISOSPORA
2021-12-10	SAFFRON FINCH	SILVER.CETAS.IBAMA 2.6 2296	X	NEG	NEG
2021-12-10	SAFFRON FINCH	SILVER.IBAMA OA 2.8 028445	X	NEG	NEG
2021-12-10	SAFFRON FINCH	SILVER.CETAS.IBAMA 2.6 2258	X	NEG	NEG
2021-12-10	SAFFRON FINCH	SILVER.SISPASS.RSA 2.8 017458	X	NEG	NEG
2021-12-10	SAFFRON FINCH	RED.CETAS 2018 2.4 12102	X	NEG	NEG
2021-12-10	SAFFRON FINCH	RED.CETAS 2018 2.6 12289	X	NEG	NEG
2021-12-10	SAFFRON FINCH	RED.CETAS 2018 2.6 12286	X	NEG	NEG
2021-12-10	SAFFRON FINCH	RED.CETAS 2018 2.6 12293	X	NEG	NEG
2022-01-04	GW SALTATOR	SILVER.CETAS.IBAMA 3.5 2302	NEG	NEG	NEG
2022-01-04	GW SALTATOR	SILVER.CETAS.IBAMA 3.5 2396	NEG	NEG	NEG
2022-01-04	GW SALTATOR	SILVER.CETAS.IBAMA 3.8 1261	NEG	NEG	NEG
2022-01-04	GW SALTATOR	SILVER.IBAMA OA 3.5 545644	NEG	NEG	NEG
2022-01-04	GW SALTATOR	SILVER.CETAS.IBAMA 3.8 1263	NEG	NEG	NEG
2022-01-04	GW SALTATOR	SILVER.CETAS.IBAMA 3.5 2317	NEG	NEG	NEG	58 OOCYSTS
2022-01-04	GW SALTATOR	RED.CETAS 2018 3.5 06697	NEG	NEG	NEG	ISOSPORA
2022-01-04	GW SALTATOR	SILVER.IBAMA 04-05 3.4 088729	NEG	NEG	NEG
2022-01-04	GW SALTATOR	RED.CETAS 2018 4.0 05022	NEG	NEG	NEG
2022-01-04	GW SALTATOR	SILVER.CETAS.IBAMA 3.5 2339	NEG	NEG	NEG
2022-01-04	GW SALTATOR	RED.CETAS 2018 4.0 05092	NEG	NEG	NEG
2022-01-04	GW SALTATOR	SILVER.CETAS.IBAMA 3.8 1263	NEG	NEG	NEG
2022-01-04	GW SALTATOR	SILVER.CETAS.IBAMA 3.5 2339	NEG	NEG	NEG
2022-01-04	GW SALTATOR	SILVER.IBAMA OA 3.5 545644	NEG	NEG	NEG
2022-01-04	GW SALTATOR	SILVER.CETAS.IBAMA 3.5 2317	NEG	NEG	NEG
2022-01-04	DIADEMED TANAGER	SILVER.CETAS.IBAMA 34241	X	NEG	NEG
2022-01-04	DIADEMED TANAGER	SILVER.CETAS.IBAMA 34252	X	NEG	NEG	44 OOCYSTS
2022-01-04	DIADEMED TANAGER	SILVER.CETAS.IBAMA 2338	X	NEG	NEG	ISOSPORA
2022-01-04	DIADEMED TANAGER	SILVER.CETAS.IBAMA 34237	X	NEG	NEG
2022-01-04	DIADEMED TANAGER	SILVER.CETAS.IBAMA 3.5 2338	X	NEG	NEG
2022-01-04	DIADEMED TANAGER	RED.CETAS 2018 3.0 04201	X	NEG	NEG
2022-01-04	RC CARDINAL	SILVER.CRAS.PET 3.7 96732	NEG	NEG	NEG
2022-01-04	RC CARDINAL	SILVER.CRAS.PET 3.7 96706	NEG	NEG	NEG
2022-01-04	RC CARDINAL	SILVER.CRAS.PET 3.7 96730	NEG	NEG	NEG
2022-01-04	RC CARDINAL	SILVER.CRAS.PET 3.7 96751	NEG	NEG	NEG
2022-01-04	RC CARDINAL	SILVER.CRAS.PET 3.7 96749	NEG	NEG	NEG
2022-01-04	RC CARDINAL	SILVER.CRAS.PET 3.7 96750	NEG	NEG	NEG
2022-01-04	RC CARDINAL	SILVER.CRAS.PET 3.7 96765	NEG	NEG	NEG	UNCOUNTABLE
2022-01-04	RC CARDINAL	SILVER.CETAS.IBAMA 2015 3.2 34254	NEG	NEG	NEG	OOCYSTS
2022-01-04	RC CARDINAL	SILVER.CETAS.IBAMA 2015 3.2 34236	NEG	NEG	NEG	ISOSPORA
2022-01-04	RC CARDINAL	RED.CETAS 2018 3.8 01692	NEG	NEG	NEG
2022-01-04	RC CARDINAL	SILVER.CRAS.PET 3.7 96714	NEG	NEG	NEG
2022-01-04	RC CARDINAL	SILVER.CRAS.PET 3.7 96732	NEG	NEG	NEG
2022-01-04	RC CARDINAL	RED.CETAS 2018 3.5 06666	NEG	NEG	NEG
2022-01-04	RC CARDINAL	RED.CETAS 2018 3.5 06697	NEG	NEG	NEG
2022-01-04	RC CARDINAL	SILVER.CRAS.PET 3.7 96719	NEG	NEG	NEG
2022-01-04	RC CARDINAL	SILVER.CEMAS-UFRGS 3.5 263	NEG	NEG	NEG
2022-01-04	RC CARDINAL	RED.CETAS 2018 2.6 12261	NEG	NEG	NEG
2022-01-04	SAFFRON FINCH	SILVER.CETAS.IBAMA 2.6 2269	X	NEG	NEG
2022-01-04	SAFFRON FINCH	RED.CETAS 2018 2.4 11276	X	NEG	NEG	12 OOCYSTS
2022-01-04	SAFFRON FINCH	SILVER.SISPASS.RSA 2.8 019170	X	NEG	NEG	ISOSPORA
2022-01-04	SAFFRON FINCH	SILVER.CETAS 2015 2.5 1509	X	NEG	NEG
2022-01-04	SAFFRON FINCH	RED.CETAS 2018 2.6 12261	X	NEG	NEG
2022-01-04	ULTR GROSBEAK	SILVER.CETAS.IBAMA 2.8 2262	X	NEG	NEG
2022-01-04	ULTR GROSBEAK	RED.CETAS 2018 2.6 08227	X	NEG	NEG
2022-01-04	ULTR GROSBEAK	SILVER.SISPASS.SCA 2.8 012846	X	NEG	NEG	19 OOCYSTS
2022-01-04	ULTR GROSBEAK	SILVER.SISPASS.RSA 2.8 025417	X	NEG	NEG	ISOSPORA
2022-01-04	ULTR GROSBEAK	RED.CETAS 2018 3.0 04602	X	NEG	NEG
2022-01-04	ULTR GROSBEAK	SILVER.CETAS.IBAMA 2.6 2281	X	NEG	NEG
2022-07-04	GW SALTATOR	SILVER.CETAS.IBAMA 3.8 2095	NEG	NEG	NEG
2022-07-04	GW SALTATOR	SILVER.CETAS.IBAMA 3.8 2098	NEG	NEG	NEG
2022-07-04	GW SALTATOR	RED.CETAS 2018 4.0 04839	NEG	NEG	NEG
2022-07-04	GW SALTATOR	FOG 96-97 ACPS 6076	NEG	NEG	NEG
2022-07-04	GW SALTATOR	SILVER.SISPASS.RSA 3.5 008191	NEG	NEG	NEG
2022-07-04	GW SALTATOR	RED.CETAS 2018 4.0 11691	NEG	NEG	NEG
2022-07-04	GW SALTATOR	SILVER.CETAS 2015 3.2 34060	IV	NEG	NEG
2022-07-04	GW SALTATOR	SILVER.CETAS 2015 3.2 34061	NEG	NEG	NEG
2022-07-04	GW SALTATOR	SILVER.CETAS 2015 3.2 34078	NEG	NEG	NEG
2022-07-04	GW SALTATOR	SILVER.CETAS 2015 3.2 34082	NEG	NEG	NEG	62 OOCYSTS
2022-07-04	GW SALTATOR	RED.CETAS 2018 3.5 042301	NEG	NEG	NEG	ISOSPORA
2022-07-04	GW SALTATOR	SILVER.CETAS.IBAMA 4.0 649920	NEG	NEG	NEG	Capillaria
2022-07-04	GW SALTATOR	RED.CETAS 2018 3.5 18824	NEG	NEG	NEG
2022-07-04	GW SALTATOR	RED.CETAS 2018 3.5 18826	NEG	NEG	NEG
2022-07-04	GW SALTATOR	RED.CETAS 2018 3.5 18827	NEG	NEG	NEG
2022-07-04	GW SALTATOR	RED.CETAS 2018 3.5 18028	NEG	NEG	NEG
2022-07-04	GW SALTATOR	RED.CETAS 2018 3.5 18825	NEG	NEG	NEG
2022-07-04	GW SALTATOR	RED.CETAS 2018 3.5 18884	NEG	NEG	NEG
2022-07-04	GW SALTATOR	RED.CETAS 2018 3.5 18888	NEG	NEG	NEG
2022-07-04	GW SALTATOR	SILVER.IBAMA OA 3.5 129055	NEG	NEG	NEG
2022-07-12	RC CARDINAL	SILVER.CETAS 2015 3.2 34092	NEG	NEG	NEG
2022-07-12	RC CARDINAL	SILVER.CETAS 2018 4.5 03310	NEG	NEG	NEG
2022-07-12	RC CARDINAL	SILVER.CETAS 2018 4.5 07451	NEG	NEG	NEG
2022-07-12	RC CARDINAL	SILVER.CETAS 2018 4.5 07452	NEG	NEG	NEG
2022-07-12	RC CARDINAL	SILVER.CETAS 2018 4.5 07454	NEG	NEG	NEG
2022-07-12	RC CARDINAL	SILVER.CETAS 2018 4.5 07455	NEG	NEG	NEG
2022-07-12	RC CARDINAL	SIVER.CETAS 2018 4.5 07457	NEG	NEG	NEG
2022-07-12	RC CARDINAL	SIVER.CETAS 2018 4.5 07457	NEG	NEG	NEG
2022-07-12	RC CARDINAL	RED.CETAS 2018 4.0 04797	NEG	NEG	NEG
2022-07-12	RC CARDINAL	RED.CETAS 2018 3.5 18835	NEG	NEG	NEG	106 OOCYSTS
2022-07-12	RC CARDINAL	RED.CETAS 2018 3.5 18840	NEG	NEG	NEG	ISOSPORA
2022-07-12	RC CARDINAL	RED.CETAS 2018 3.5 18842	NEG	NEG	NEG
2022-07-12	RC CARDINAL	RED.CETAS 2018 3.5 18843	NEG	NEG	NEG
2022-07-12	RC CARDINAL	RED.CETAS 2018 3.5 18893	NEG	NEG	NEG
2022-07-12	RC CARDINAL	RED.CETAS 2018 3.5 18023	NEG	NEG	NEG
2022-07-12	RC CARDINAL	RED.CETAS 2018 3.5 18024	NEG	NEG	NEG
2022-07-12	RC CARDINAL	RED.CETAS 2018 3.5 18025	NEG	NEG	NEG
2022-07-12	RC CARDINAL	RED.CETAS 2018 3.5 18026	NEG	NEG	NEG
2022-07-12	RC CARDINAL	SILVER.CETAS 2015 3.2 34422	NEG	NEG	NEG
2022-07-12	RC CARDINAL	SILVER.CETAS 2015 3.2 34425	NEG	NEG	NEG
2022-07-12	RC CARDINAL	SILVER.CETAS 2015 3.2 34426	NEG	NEG	NEG
2022-07-12	RC CARDINAL	SILVER.CETAS 2015 3.2 34431	NEG	NEG	NEG
2022-07-12	GW SALTATOR	RED.CETAS 2018 3.5 18030	NEG	NEG	NEG
2022-07-12	GW SALTATOR	RED.CETAS 2018 3.5 18040	NEG	NEG	NEG
2022-07-12	GW SALTATOR	SILVER.CETAS 2015 3.2 34060	NEG	NEG	NEG
2022-07-12	GW SALTATOR	SILVER.CETAS 2015 3.2 34085	IV	NEG	NEG
2022-07-12	GW SALTATOR	SILVER.CETAS 2015 3.2 34088	NEG	NEG	NEG
2022-07-12	GW SALTATOR	RED.CETAS 2018 4.0 04784	NEG	NEG	NEG	74 OOCYSTS
2022-07-12	GW SALTATOR	RED.CETAS 2018 3.5 18030	NEG	NEG	NEG	ISOSPORA
2022-07-12	GW SALTATOR	RED.CETAS 2018 3.5 18032	NEG	NEG	NEG
2022-07-12	GW SALTATOR	RED.CETAS 2018 4.0 11678	NEG	NEG	NEG
2022-07-12	GW SALTATOR	RED.CETAS 2018 4.0 11679	NEG	NEG	NEG
2022-07-12	GW SALTATOR	RED.CETAS 2018 4.0 11680	IV	NEG	NEG
2022-07-12	GW SALTATOR	RED.CETAS 2018 4.0 11677	NEG	NEG	NEG
2022-07-12	GW SALTATOR	RED.CETAS 2018 3.5 18948	NEG	NEG	NEG
REF.A
REF.A
REF.A
REF.A
REF.B
REF.B
REF.B
REF.B
IV	isufficient volume

## Sheet: NDV controls
	BIRDS	CARDINALS	SALTATORS
UHA NDV TITER	1	1:256	1:16
UHA NDV TITER	2	1:128	1:32
UHA NDV TITER	3	1:32	1:128
GMT		101.5	51.1
CV (%)		29.91	17.32
